# Supplementary material
Source: publisher figshare collection journal article supplement (https://acs.figshare.com/ndownloader/files/25609675)
Supplement: Supplementary file 1 [file 25609675]

## Supporting Information

### **Phosphorescent Tetradentate Platinum(II) Complexes Containing Fused 6/5/5 or 6/5/6 Metallocycles**

Guijie Li,<sup>\*,1</sup> Gang Shen,<sup>1</sup> Xiaoli Fang,<sup>1</sup> Yun-Fang Yang,<sup>\*,1</sup> Feng Zhan,<sup>1</sup> Jianbing Zheng,<sup>1</sup> Weiwei Lou,<sup>1</sup> Qisheng Zhang<sup>2</sup> and Yuanbin She<sup>\*,1</sup>

<sup>1</sup>College of Chemical Engineering, Zhejiang University of Technology, Hangzhou, Zhejiang 310014,  
P. R. China

<sup>2</sup>MOE Key Laboratory of Macromolecular Synthesis and Functionalization, Department of Polymer  
Science and Engineering, Zhejiang University, Hangzhou 310027, P. R. China

E-mail: guijieli@zjut.edu.cn; yangyf@zjut.edu.cn; sheyb@zjut.edu.cn

## Table of Contents

|    |                                                                                                                                                                                                                 |           |
|----|-----------------------------------------------------------------------------------------------------------------------------------------------------------------------------------------------------------------|-----------|
| 1  | General Information                                                                                                                                                                                             | S-3–S-4   |
| 2  | <b>Table S1.</b> DFT calculations for Pt(II) complexes                                                                                                                                                          | S-5       |
| 3  | <b>Table S2.</b> Selected bond lengths, bond angles and dihedral angles of the Pt(II) complexes based on the DFT calculation                                                                                    | S-6       |
| 4  | <b>Table S3.</b> Crystal data and structure refinement for Pt( <i>bp</i> -6)                                                                                                                                    | S-7       |
| 5  | <b>Table S4.</b> Crystal data and structure refinement for Pt( <i>bp</i> -7)                                                                                                                                    | S-8       |
| 6  | <b>Figure S1.</b> Density functional theory calculations of frontier orbitals and spin densities of T <sub>1</sub> states for Pt(II) complexes based on optimized S <sub>0</sub> and T <sub>1</sub> geometries. | S-9       |
| 7  | <b>Figure S2:</b> Cyclic voltammograms of the Pt(II) complexes                                                                                                                                                  | S-10      |
| 8  | <b>Figure S3:</b> Absorption spectra of the Pt(II) complexes and their ligands                                                                                                                                  | S-11      |
| 9  | <b>Tables S5–S8:</b> DFT calculations of excited state energy level, wavelength and frontier orbitals for the Pt(II) complexes                                                                                  | S-11–S-12 |
| 10 | <b>Figure S4.</b> Natural transition orbitals (NTOs) of the S <sub>1</sub> and T <sub>1</sub> states for Pt(II) complexes based on optimized S <sub>0</sub> geometry                                            | S-13      |
| 11 | <b>Figure S5.</b> Luminescence spectra of the Pt(II) complexes at 77K in 2-MeTHF, at RT in DCM solution and at RT in PMMA film                                                                                  | S-14      |
| 12 | <b>Figure S6.</b> Luminescence spectra comparison measured by different spectrometers.                                                                                                                          | S-14      |
| 13 | Detailed synthetic procedures of the Pt(II) complexes                                                                                                                                                           | S-15–S-25 |
| 14 | <sup>1</sup> H, <sup>13</sup> C NMR spectra and HRMS of the Pt(II) complexes                                                                                                                                    | S-26–S-36 |
| 15 | Cartesian Coordinates of the Structures                                                                                                                                                                         | S-37–S-51 |
| 16 | References                                                                                                                                                                                                      | S-52      |

## General Information.

**Synthesis and Characterization.** Unless noted, all commercial reagents were purchased and used as received without further purification.  $^1\text{H}$  NMR spectra were recorded at 400 or 500 MHz, and  $^{13}\text{C}$  NMR spectra were recorded at 100 or 150 MHz NMR instruments in  $\text{CDCl}_3$  or  $\text{DMSO}-d_6$  solutions and chemical shifts were referenced to tetramethylsilane (TMS) or residual protiated solvent. If  $\text{CDCl}_3$  was used as solvent,  $^1\text{H}$  and  $^{13}\text{C}$  NMR spectra were recorded with TMS ( $\delta = 0.00$  ppm) and  $\text{CDCl}_3$  ( $\delta = 77.00$  ppm) as internal references, respectively. If  $\text{DMSO}-d_6$  was used as solvent,  $^1\text{H}$  and  $^{13}\text{C}$  NMR spectra were recorded with TMS ( $\delta = 0.00$  ppm) and  $\text{DMSO}-d_6$  ( $\delta = 39.52$  ppm) as internal references, respectively. The following abbreviations (or combinations thereof) were used to explain  $^1\text{H}$  NMR multiplicities: s = singlet, d = doublet, t = triplet, q = quartet, p = quintet, m = multiplet, br = broad. All of the new compounds were analyzed for HRMS on a mass spectrometer using electrospray ionization in positive ion mode on ESI-QTOF mass spectrometer from Applied Biosystems.

**Electrochemistry.** Cyclic voltammetry and different pulsed voltammetry were performed using a CH1760E electrochemical analyzer according previous report.<sup>1</sup> 0.1 M tetra-*n*-butylammonium hexafluorophosphate was used as the supporting electrolyte, anhydrous *N,N*-dimethylformamide, was used as the solvents for the  $E_{\text{ox}}$  and  $E_{\text{red}}$  measurements, and the solutions were bubbled with nitrogen for 15 min prior to the test. Silver wire, platinum wire and glassy carbon were used as pseudoreference electrode, counter electrode, and working electrode respectively. Scan rate was 300 mV/s. The redox potentials are based on the values measured from different pulsed voltammetry and are reported relative to an internal reference ferrocenium/ferrocene ( $\text{Cp}_2\text{Fe}/\text{Cp}_2\text{Fe}^+$ ).<sup>2</sup> The reversibility of reduction or oxidation was determined using CV.<sup>3</sup> As defined, if the magnitudes of the peak anodic and the peak cathodic current have an equal magnitude as scan speeds of 100 mV/s or slower, then the process is considered reversible; if the magnitudes of the peak anodic and the peak cathodic currents are not equal, but the return sweeps are nonzero, the process is considered quasi-reversible; otherwise, the process is considered irreversible.<sup>2,3</sup>

**DFT Calculations.** The theoretical calculations of the Pt(II) complexes were performed using Gaussian 09. The molecular geometries of ground states ( $S_0$ ) were optimized with the density functional theory (DFT) method. The DFT calculations were performed using a B3LYP function with

a basis set of 6-31G(d) for C, H, O and N atoms and a LANL2DZ basis set for Pt atom.<sup>4</sup> The energies of the singlet and triplet excited states of the complexes were calculated using TD-B3LYP method with a basis set of SV for H, SVP for C, O and N atoms, and a def2-TZVP basis set for Pt atom based on the optimized  $S_0$  geometry.<sup>4</sup>

**Photophysical Measurements.** The absorption spectra were measured on an Agilent 8453 UV–VS Spectrometer. Steady state emission experiments and lifetime measurements were performed on a Horiba Jobin Yvon FluoroLog-3 spectrometer. Low temperature (77 K) emission spectra and lifetimes were measured in 2-MeTHF cooled with liquid nitrogen.

**Device Fabrication and Characterization.** All devices were fabricated by vacuum thermal evaporation, and were tested outside glove box after encapsulation. Prior to deposition, the prepatterned ITO coated glass substrates were cleaned by subsequent sonication in deionized water, acetone, and isopropanol. Organic layers were deposited at rates of 0.5 to 2.0 Å/s, monitored by crystal oscillator, in a custom-made vacuum thermal evaporation chamber built by LN Inc (LN-1082FS). The Al cathode was deposited through a shadow mask without breaking vacuum, defining device areas of 0.09 cm<sup>2</sup>. The current-voltage-luminance characteristics were measured using a Keithley 2400 SourceMeter in conjunction with a PMTH-S1-CR131A Photodiode. Electroluminescent spectra were measured with an Ocean Optics USB2000 spectrometer.

| Table S1. DFT Calculations for Pt(II) Complexes <sup>a</sup> |                                                                                     |                                                                                     |                                                                                      |
|--------------------------------------------------------------|-------------------------------------------------------------------------------------|-------------------------------------------------------------------------------------|--------------------------------------------------------------------------------------|
| complexes                                                    | Front view                                                                          | Side view                                                                           | Top view                                                                             |
| Pt( <i>ppy</i> -1)                                           | 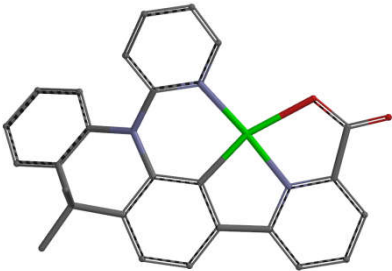   |    |    |
| Pt( <i>bp</i> -6)                                            |    |    |    |
| Pt( <i>bp</i> -7)                                            |   |   |   |
| Pt( <i>bp</i> -8)                                            |  |  |  |

<sup>a</sup>Optimized  $S_0$  were calculated using a B3LYP method with a basic set of 6-31G(d) for C, H, O and N atoms and a LANL2DZ basic set for Pt atom.

**Table S2. Selected Bond Lengths (Å), Bond Angles (°) and Dihedral Angles (°) for Tetradentate Pt(II) Complexes Based on the DFT Calculations and X-ray analysis.**

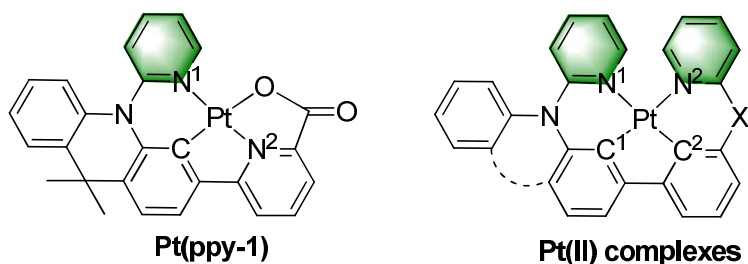

| Pt( <i>ppy</i> -1)                | Pt-N <sup>1</sup> | Pt-C              | Pt-N <sup>2</sup> | Pt-O              |
|-----------------------------------|-------------------|-------------------|-------------------|-------------------|
| Pt( <i>ppy</i> -1)_S <sub>0</sub> | 2.047             | 1.952             | 1.973             | 2.186             |
| Pt( <i>ppy</i> -1)_T <sub>1</sub> | 2.055             | 1.921             | 1.948             | 2.132             |
| complexes                         | Pt-N <sup>1</sup> | Pt-C <sup>1</sup> | Pt-C <sup>2</sup> | Pt-N <sup>2</sup> |
| Pt( <i>bp</i> -6)_X-ray           | 2.115(2)          | 1.981(3)          | 1.968(3)          | 2.121(3)          |
| Pt( <i>bp</i> -6)_S <sub>0</sub>  | 2.187             | 1.984             | 1.980             | 2.195             |
| Pt( <i>bp</i> -6)_T <sub>1</sub>  | 2.176             | 1.956             | 1.954             | 2.166             |
| Pt( <i>bp</i> -7)_X-ray           | 2.1460(19)        | 1.953(2)          | 2.126(2)          | 1.973(2)          |
| Pt( <i>bp</i> -7)_S <sub>0</sub>  | 2.232             | 1.970             | 1.981             | 2.196             |
| Pt( <i>bp</i> -7)_T <sub>1</sub>  | 2.209             | 1.942             | 1.961             | 2.195             |
| Pt( <i>bp</i> -8)_S <sub>0</sub>  | 2.237             | 1.970             | 1.993             | 2.184             |
| Pt( <i>bp</i> -8)_T <sub>1</sub>  | 2.214             | 1.942             | 1.972             | 2.174             |

| Pt( <i>ppy</i> -1)                | N <sup>1</sup> -Pt-C              | C-Pt-N <sup>2</sup>               | N <sup>2</sup> -Pt-O              | O-Pt-N <sup>1</sup>               | N <sup>1</sup> -Pt-N <sup>2</sup> | C-Pt-O                            | dihedral angle <sup>a</sup> |
|-----------------------------------|-----------------------------------|-----------------------------------|-----------------------------------|-----------------------------------|-----------------------------------|-----------------------------------|-----------------------------|
| Pt( <i>ppy</i> -1)_S <sub>0</sub> | 93.14                             | 82.43                             | 79.33                             | 104.99                            | 173.27                            | 161.75                            | 16.6                        |
| Pt( <i>ppy</i> -1)_T <sub>1</sub> | 93.12                             | 83.65                             | 79.84                             | 103.36                            | 174.76                            | 163.49                            | 16.5                        |
| complexes                         | N <sup>1</sup> -Pt-C <sup>1</sup> | C <sup>1</sup> -Pt-C <sup>2</sup> | C <sup>2</sup> -Pt-N <sup>2</sup> | N <sup>2</sup> -Pt-N <sup>1</sup> | N <sup>1</sup> -Pt-C <sup>2</sup> | C <sup>1</sup> -Pt-N <sup>2</sup> | dihedral angle <sup>a</sup> |
| Pt( <i>bp</i> -6)_X-ray           | 90.24(10)                         | 82.17(12)                         | 89.65(12)                         | 99.86(9)                          | 164.93(10)                        | 167.23(10)                        | 55.2                        |
| Pt( <i>bp</i> -6)_S <sub>0</sub>  | 89.04                             | 82.25                             | 89.69                             | 100.63                            | 164.85                            | 168.12                            | 48.9                        |
| Pt( <i>bp</i> -6)_T <sub>1</sub>  | 89.22                             | 82.93                             | 89.61                             | 99.80                             | 165.86                            | 168.50                            | 46.9                        |
| Pt( <i>bp</i> -7)_X-ray           | 88.56(9)                          | 81.43(10)                         | 89.96(9)                          | 101.46(7)                         | 165.37(9)                         | 167.62(9)                         | 51.2                        |
| Pt( <i>bp</i> -7)_S <sub>0</sub>  | 88.67                             | 81.44                             | 89.48                             | 102.09                            | 165.12                            | 166.27                            | 52.4                        |
| Pt( <i>bp</i> -7)_T <sub>1</sub>  | 88.79                             | 82.15                             | 89.40                             | 101.28                            | 166.29                            | 166.47                            | 50.8                        |
| Pt( <i>bp</i> -8)_S <sub>0</sub>  | 88.65                             | 81.95                             | 90.15                             | 100.95                            | 165.65                            | 166.89                            | 52.6                        |
| Pt( <i>bp</i> -8)_T <sub>1</sub>  | 88.61                             | 82.60                             | 90.22                             | 100.21                            | 166.41                            | 167.37                            | 50.0                        |

<sup>a</sup>Dihedral angle between terminal pyridine and carboxyl planes for Pt(*ppy*-1), between two terminal pyridine planes for Pt(*bp*-6) and Pt(*bp*-7), between terminal pyridine and aza carbazole planes for Pt(*bp*-8). Optimized S<sub>0</sub> were calculated using a B3LYP method with a basic set of 6-31G(d) for C, H, O and N atoms and a LANL2DZ basic set for Pt atom.

**Table S3. Crystal data and structure refinement for Pt(*bp*-6) (CCDC 2036928).**

|                                             |                                                               |
|---------------------------------------------|---------------------------------------------------------------|
| Identification code                         | 201013_BP_6_0m_sq                                             |
| Empirical formula                           | C <sub>31</sub> H <sub>23</sub> N <sub>3</sub> OPt            |
| Formula weight                              | 648.61                                                        |
| Temperature/K                               | 170.0                                                         |
| Crystal system                              | monoclinic                                                    |
| Space group                                 | P2 <sub>1</sub> /n                                            |
| a/Å                                         | 15.274(6)                                                     |
| b/Å                                         | 11.865(3)                                                     |
| c/Å                                         | 16.488(5)                                                     |
| α/°                                         | 90                                                            |
| β/°                                         | 117.245(14)                                                   |
| γ/°                                         | 90                                                            |
| Volume/Å <sup>3</sup>                       | 2656.5(15)                                                    |
| Z                                           | 4                                                             |
| ρ <sub>calc</sub> /g/cm <sup>3</sup>        | 1.622                                                         |
| μ/mm <sup>-1</sup>                          | 5.310                                                         |
| F(000)                                      | 1264.0                                                        |
| Crystal size/mm <sup>3</sup>                | 0.35 × 0.16 × 0.03                                            |
| Radiation                                   | MoKα (λ = 0.71073)                                            |
| 2θ range for data collection/°              | 4.416 to 58.182                                               |
| Index ranges                                | -18 ≤ h ≤ 20, -16 ≤ k ≤ 16, -22 ≤ l ≤ 22                      |
| Reflections collected                       | 35564                                                         |
| Independent reflections                     | 7107 [R <sub>int</sub> = 0.0397, R <sub>sigma</sub> = 0.0336] |
| Data/restraints/parameters                  | 7107/0/327                                                    |
| Goodness-of-fit on F <sup>2</sup>           | 1.038                                                         |
| Final R indexes [I ≥ 2σ (I)]                | R <sub>1</sub> = 0.0238, wR <sub>2</sub> = 0.0534             |
| Final R indexes [all data]                  | R <sub>1</sub> = 0.0388, wR <sub>2</sub> = 0.0598             |
| Largest diff. peak/hole / e Å <sup>-3</sup> | 0.64/-0.86                                                    |

**Table S4. Crystal data and structure refinement for Pt(*bp*-7) (CCDC 2036927).**

|                                             |                                                                    |
|---------------------------------------------|--------------------------------------------------------------------|
| Identification code                         | 200930_0929_1_0m                                                   |
| Empirical formula                           | C <sub>29</sub> H <sub>19</sub> Cl <sub>2</sub> N <sub>3</sub> OPt |
| Formula weight                              | 691.46                                                             |
| Temperature/K                               | 170.0                                                              |
| Crystal system                              | monoclinic                                                         |
| Space group                                 | P2 <sub>1</sub> /n                                                 |
| a/Å                                         | 8.0827(3)                                                          |
| b/Å                                         | 11.0133(4)                                                         |
| c/Å                                         | 25.8648(10)                                                        |
| α/°                                         | 90                                                                 |
| β/°                                         | 98.4000(10)                                                        |
| γ/°                                         | 90                                                                 |
| Volume/Å <sup>3</sup>                       | 2277.71(15)                                                        |
| Z                                           | 4                                                                  |
| ρ <sub>calc</sub> /g/cm <sup>3</sup>        | 2.016                                                              |
| μ/mm <sup>-1</sup>                          | 6.426                                                              |
| F(000)                                      | 1336.0                                                             |
| Crystal size/mm <sup>3</sup>                | 0.26 × 0.16 × 0.09                                                 |
| Radiation                                   | MoKα (λ = 0.71073)                                                 |
| 2θ range for data collection/°              | 4.88 to 61.034                                                     |
| Index ranges                                | -7 ≤ h ≤ 11, -15 ≤ k ≤ 15, -36 ≤ l ≤ 36                            |
| Reflections collected                       | 26825                                                              |
| Independent reflections                     | 6942 [R <sub>int</sub> = 0.0374, R <sub>sigma</sub> = 0.0331]      |
| Data/restraints/parameters                  | 6942/0/325                                                         |
| Goodness-of-fit on F <sup>2</sup>           | 1.041                                                              |
| Final R indexes [I ≥ 2σ (I)]                | R <sub>1</sub> = 0.0219, wR <sub>2</sub> = 0.0505                  |
| Final R indexes [all data]                  | R <sub>1</sub> = 0.0245, wR <sub>2</sub> = 0.0519                  |
| Largest diff. peak/hole / e Å <sup>-3</sup> | 0.76/-1.54                                                         |



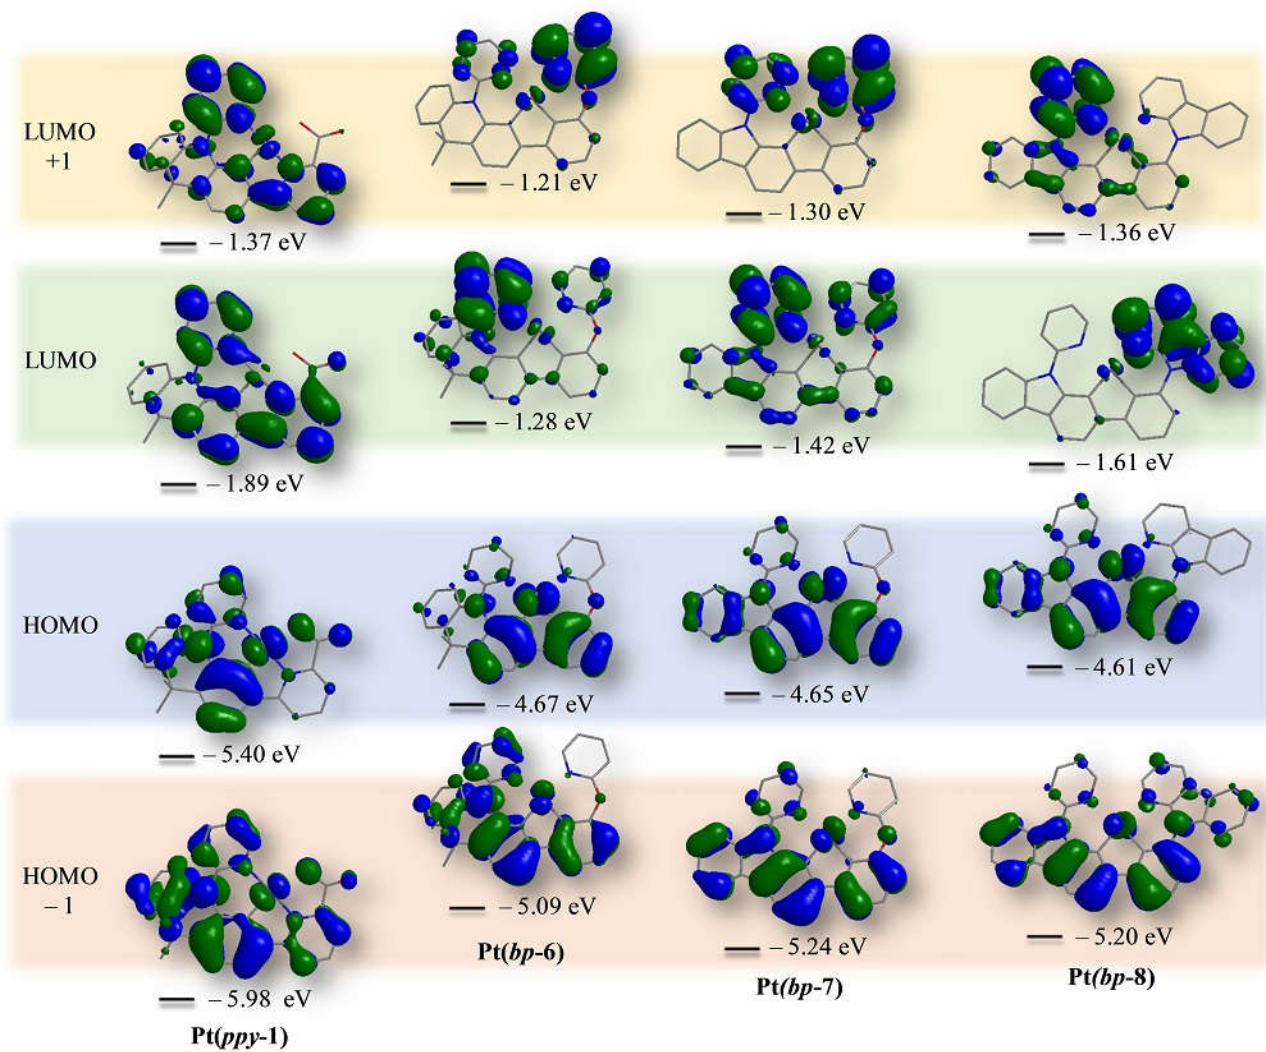

**Figure S1.** Density functional theory calculations of frontier orbitals and spin densities of  $T_1$  states for Pt(II) complexes based on optimized  $S_0$  and  $T_1$  geometries. The H atoms were omitted for clarity.

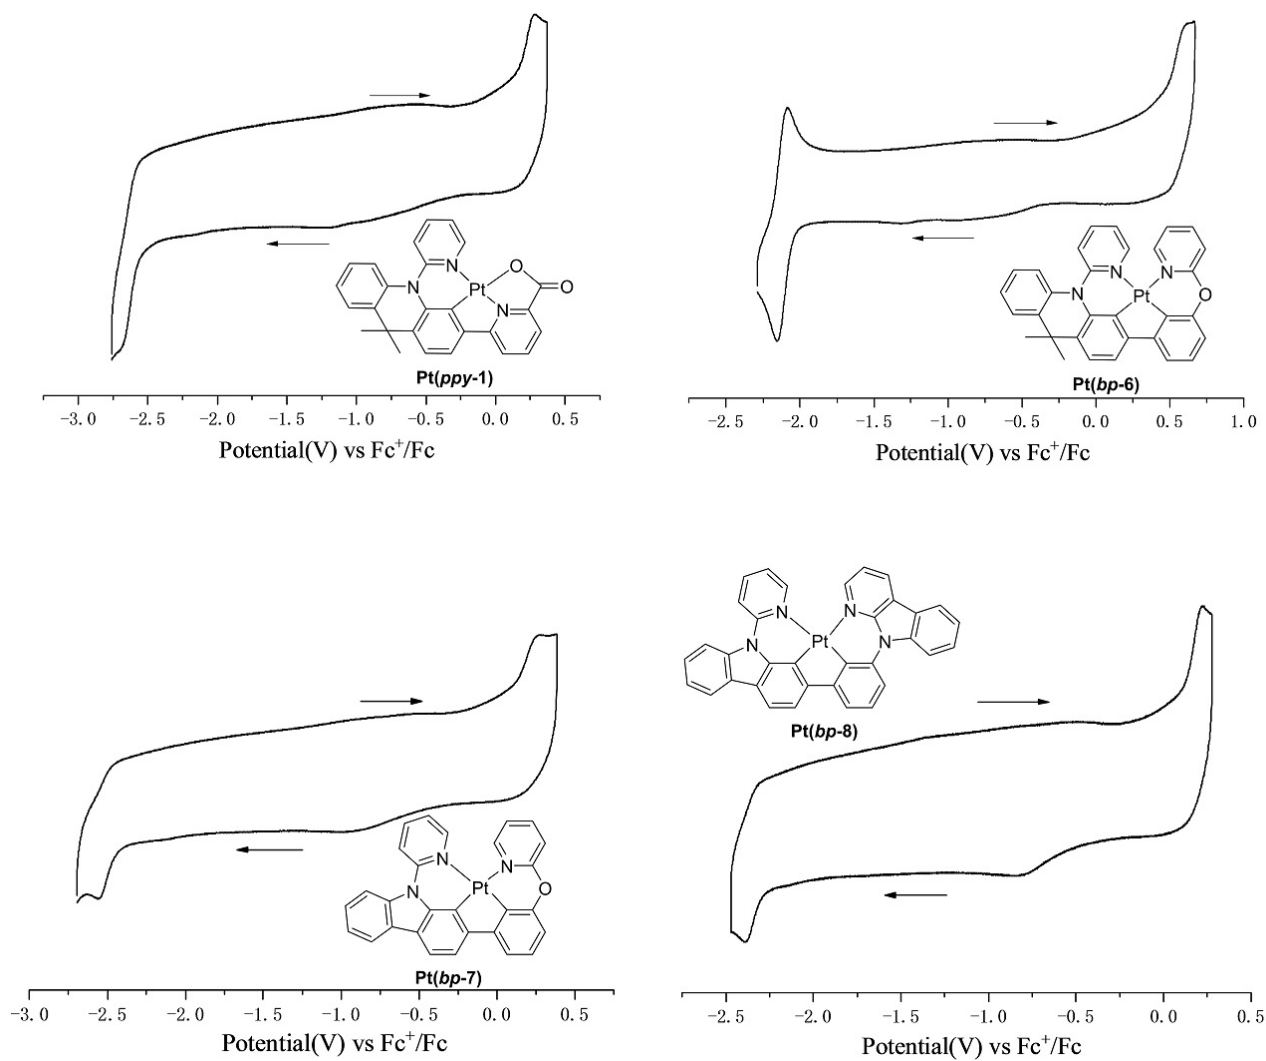

**Figure S2.** Cyclic voltammograms of Pt(II) complexes in *N,N*-dimethylformamide.

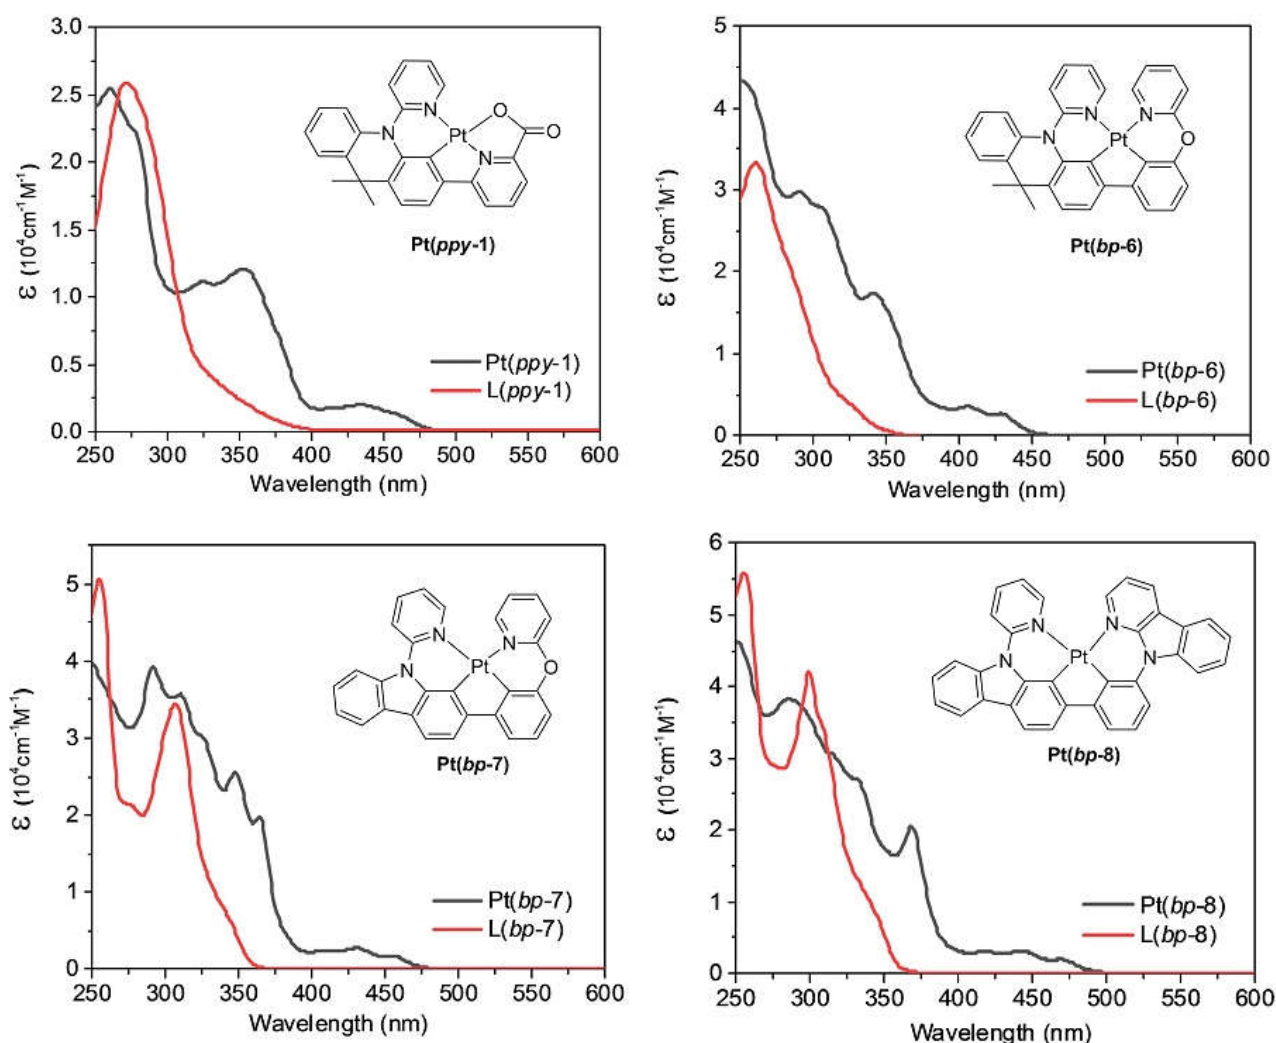

**Figure S3.** Absorption spectra of Pt(II) complexes and their ligands in dichloromethane solution.

**Table S5.** TD-B3LYP/SV/SVP/def2-TZVP results of **Pt(ppy-1)** at optimized  $S_0$  geometry.

| excited state  | energy<br>[eV] | wavelength<br>[nm] | f      | major contributions                                                                    |
|----------------|----------------|--------------------|--------|----------------------------------------------------------------------------------------|
| T <sub>1</sub> | 2.472          | 502                | 0.0000 | HOMO → LUMO (87%)                                                                      |
| S <sub>1</sub> | 2.716          | 457                | 0.0196 | HOMO → LUMO (96%)                                                                      |
| T <sub>2</sub> | 2.759          | 449                | 0.0000 | HOMO-1 → LUMO (39%)<br>HOMO-1 → LUMO+2 (4%)<br>HOMO → LUMO (8%)<br>HOMO → LUMO+1 (25%) |
| S <sub>2</sub> | 3.222          | 385                | 0.0158 | HOMO → LUMO+1 (88%)<br>HOMO → LUMO+2 (7%)                                              |

**Table S6.** TD-B3LYP/SV/SVP/def2-TZVP results of **Pt(bp-6)** at optimized S<sub>0</sub> geometry.

| excited state  | energy [eV] | wavelength [nm] | f      | major contributions                                                                  |
|----------------|-------------|-----------------|--------|--------------------------------------------------------------------------------------|
| T <sub>1</sub> | 2.472       | 502             | 0.0000 | HOMO → LUMO (80%)<br>HOMO → LUMO+4 (6%)                                              |
| T <sub>2</sub> | 2.587       | 479             | 0.0000 | HOMO-1 → LUMO (11%)<br>HOMO → LUMO (4%)<br>HOMO → LUMO+1 (70%)<br>HOMO → LUMO+4 (5%) |
| S <sub>1</sub> | 2.669       | 465             | 0.0212 | HOMO → LUMO (97%)                                                                    |
| S <sub>2</sub> | 2.764       | 449             | 0.0075 | HOMO → LUMO+1 (96%)                                                                  |

**Table S7.** TD-B3LYP/SV/SVP/def2-TZVP results of **Pt(bp-7)** at optimized S<sub>0</sub> geometry.

| excited state  | energy [eV] | wavelength [nm] | f      | major contributions                                                                 |
|----------------|-------------|-----------------|--------|-------------------------------------------------------------------------------------|
| T <sub>1</sub> | 2.249       | 551             | 0.0000 | HOMO → LUMO (72%)<br>HOMO → LUMO+2 (7%)<br>HOMO → LUMO+3 (9%)                       |
| T <sub>2</sub> | 2.519       | 492             | 0.0000 | HOMO-1 → LUMO (6%)<br>HOMO → LUMO (8%)<br>HOMO → LUMO+1 (73%)<br>HOMO → LUMO+3 (5%) |
| S <sub>1</sub> | 2.519       | 492             | 0.0073 | HOMO → LUMO (97%)                                                                   |
| S <sub>2</sub> | 2.687       | 461             | 0.0081 | HOMO → LUMO+1 (96%)                                                                 |

**Table S8.** TD-B3LYP/SV/SVP/def2-TZVP results of **Pt(bp-8)** at optimized S<sub>0</sub> geometry.

| excited state  | energy [eV] | wavelength [nm] | f      | major contributions                                                                  |
|----------------|-------------|-----------------|--------|--------------------------------------------------------------------------------------|
| T <sub>1</sub> | 2.196       | 565             | 0.0000 | HOMO → LUMO (57%)<br>HOMO → LUMO+1 (21%)<br>HOMO → LUMO+2 (8%)<br>HOMO → LUMO+3 (5%) |
| T <sub>2</sub> | 2.344       | 529             | 0.0000 | HOMO → LUMO (32%)<br>HOMO → LUMO+1 (55%)                                             |
| S <sub>1</sub> | 2.407       | 515             | 0.0338 | HOMO → LUMO (94%)                                                                    |
| S <sub>2</sub> | 2.533       | 490             | 0.0002 | HOMO → LUMO+1 (95%)                                                                  |

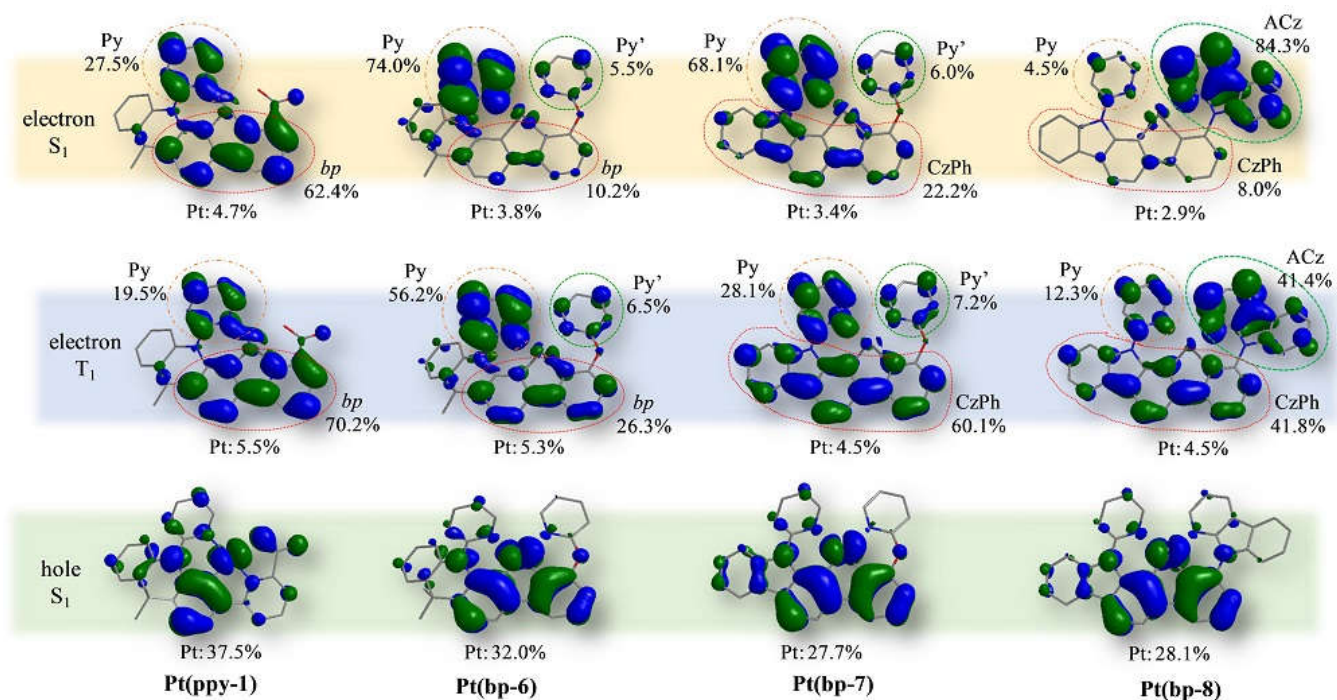

**Figure S4.** Natural transition orbitals (NTOs) of the  $S_1$  and  $T_1$  states for Pt(II) complexes based on optimized  $S_0$  geometry. All the H atoms are omitted for clarity.



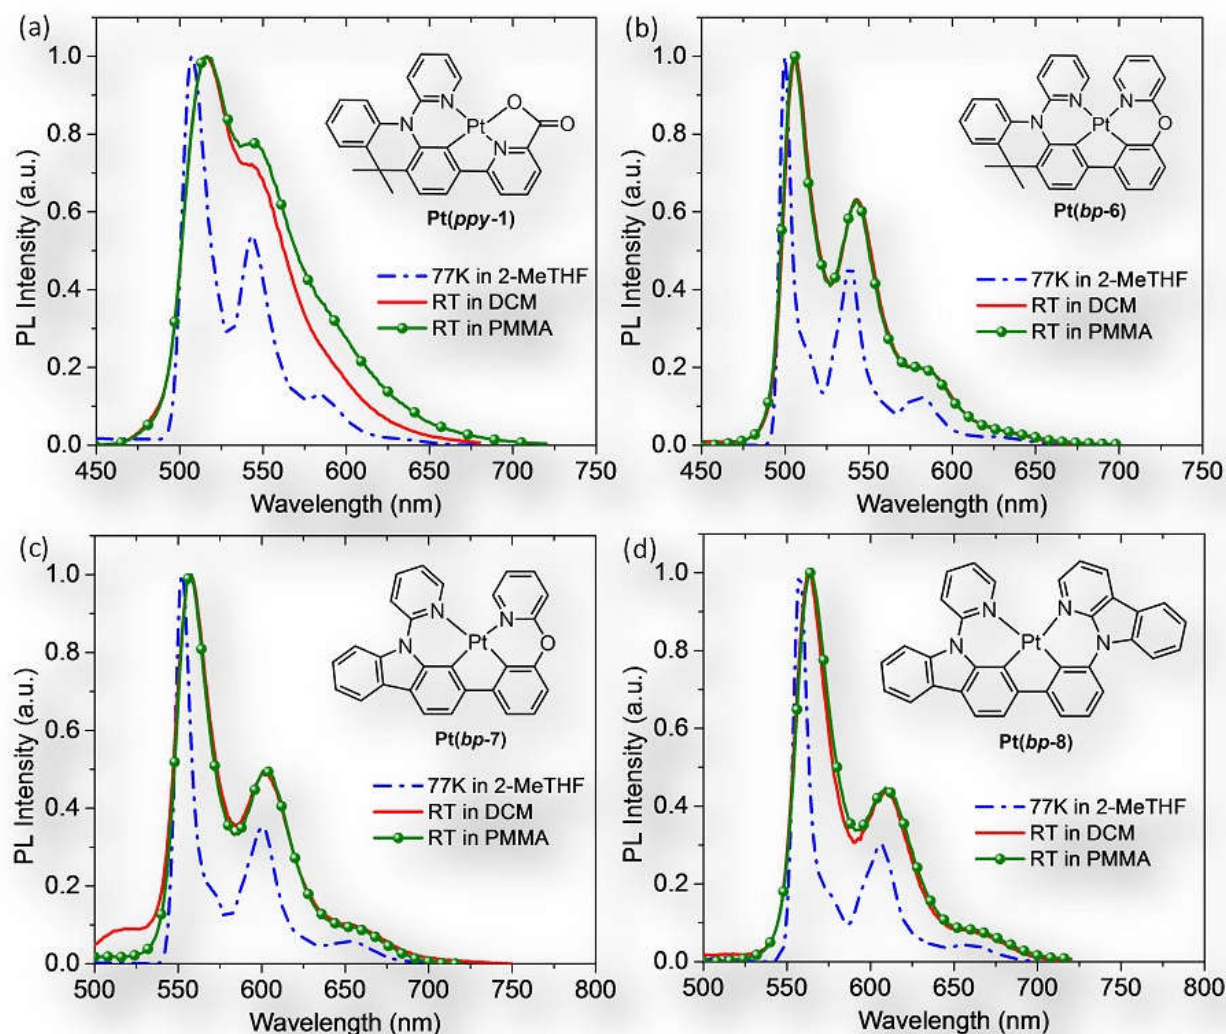

**Figure S5.** Luminescence spectra of (a) Pt(*ppy*-1), (b) Pt(*bp*-6), (c) Pt(*bp*-7), and (d) Pt(*bp*-8) at 77K in 2-MeTHF (dash-dotted lines), at RT in DCM solution (solid lines) and at RT in PMMA film (solid-ball lines). The chemical structure of each Pt(II) complex is shown in the inset.

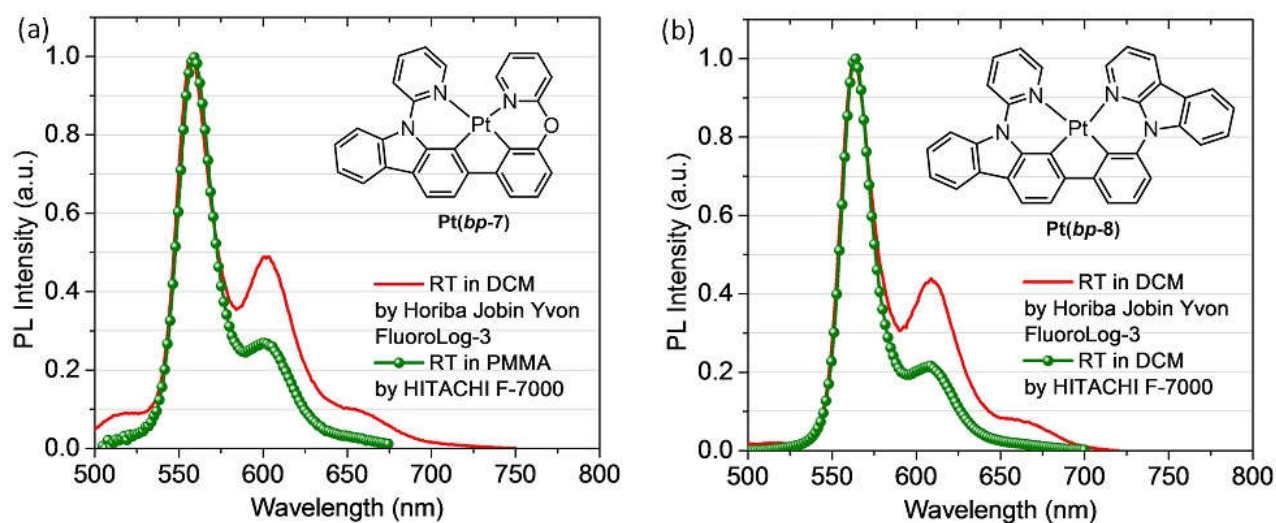

**Figure S6.** Luminescence spectra comparison measured by different spectrometers.

## Experimental Procedures

### Synthesis of **Pt(ppy-1)**:

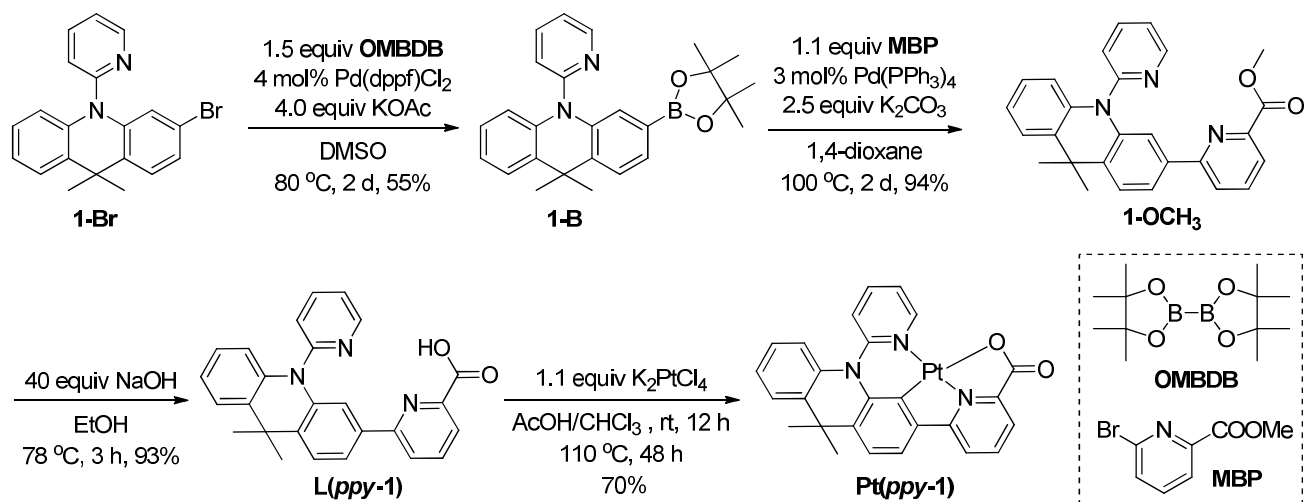

Synthesis of **1-B**: 3-Bromo-9,9-dimethyl-10-(pyridin-2-yl)-9,10-dihydroacridine **1-Br**<sup>5</sup> (1.50 g, 4.11 mmol, 1.0 equiv), **OMBDB** (1.56 g, 6.15 mmol, 1.5 equiv), **Pd(dppf)Cl<sub>2</sub>** (121 mg, 0.16 mmol, 4 mol%), **KOAc** (1.61 g, 16.50 mmol, 4.0 equiv) were added sequentially to a dry three-necked flask equipped with a magnetic stir bar. The flask was evacuated and backfilled with nitrogen, this evacuation and backfill procedure was repeated twice. Then **DMSO** (25 mL) were added under nitrogen atmosphere, and then the flask was placed in an oil bath and heated at 80 °C with stirring. The reaction was monitored by TLC until the reaction was completed. After 2 days, the resulting mixture was cooled down to room temperature, filtered and washed with ethyl acetate. The organic layer was washed with water, and then dried over **Na<sub>2</sub>SO<sub>4</sub>**, filtered, and the filtrate was concentrated under reduced pressure. The residue was purified through column chromatography on silica gel using petroleum ether/ethyl acetate = 10:1–5:1 as eluent to afford the desired product as a white solid 896 mg in 55% yield. <sup>1</sup>H NMR (500 MHz, **CDCl<sub>3</sub>**): δ 1.28 (s, 12H), 1.62 (s, 6H), 7.01–7.05 (m, 2H), 7.10 (td, *J* = 8.0, 1.5 Hz, 1H), 7.17 (ddd, *J* = 7.0, 4.5, 0.5 Hz, 1H), 7.28 (d, *J* = 8.5 Hz, 1H), 7.39 (s, 1H), 7.43 (dd, *J* = 8.0, 1.5 Hz, 1H), 7.46 (d, *J* = 8.0 Hz, 1H), 7.50 (dd, *J* = 7.5, 1.0 Hz, 1H), 7.76 (td, *J* = 8.0, 2.0 Hz, 1H), 8.62 (dd, *J* = 5.0, 1.5 Hz, 1H). <sup>13</sup>C NMR (125 MHz, **CDCl<sub>3</sub>**) : δ 24.76, 29.07, 36.97, 83.57, 118.93, 119.11, 120.07, 122.56, 123.90, 124.29, 124.74, 126.08, 129.26, 135.32, 138.75, 138.80, 139.94, 140.43, 149.68, 155.58. HRMS (ESI): calcd for **C<sub>26</sub>H<sub>30</sub>N<sub>2</sub>O<sub>2</sub>B** [**M+H**]<sup>+</sup> 413.2395, found 413.2415.

Synthesis of **1-OCH<sub>3</sub>**: **1-B** (0.68 g, 1.65 mmol, 1.0 equiv), 6-bromopyridine-2-carboxylic acid

methyl ester (0.39 g, 1.81 mmol, 1.1 equiv), Pd(PPh<sub>3</sub>)<sub>4</sub> (57 mg, 0.05 mmol, 3 mol%), K<sub>2</sub>CO<sub>3</sub> (0.57 g, 4.12 mmol, 2.5 equiv) were added sequentially to a dry three-necked flask equipped with a magnetic stir bar. The flask was evacuated and backfilled with nitrogen, this evacuation and backfill procedure was repeated twice. Then 1,4-dioxane (30 mL) were added under nitrogen atmosphere, and then the flask was placed in an oil bath and heated at 100 °C with stirring. The reaction was monitored by TLC until the reaction was completed. After 2 days, the resulting mixture was cooled down to room temperature, filtered and washed with ethyl acetate. The filtrate was concentrated under reduced pressure and the residue was purified through column chromatography on silica gel using petroleum ether/ethyl acetate = 10:1–3:1 as eluent to afford the desired product as a yellow oily solid 640 mg in 92% yield. <sup>1</sup>H NMR (500 MHz, DMSO-*d*<sub>6</sub>): δ 1.69 (s, 6H), 4.00 (s, 3H), 6.82 (dd, *J* = 8.0, 1.0, 1H), 7.05 (td, *J* = 7.5, 1.5 Hz, 1H), 7.12 (m, 1H), 7.28–7.31 (m, 1H), 7.38 (dt, *J* = 8.0, 1.0, 1H), 7.48–7.50 (m, 2H), 7.58 (d, *J* = 8.5 Hz, 1H), 7.31–7.31 (m, 2H), 7.83 (t, *J* = 2.5 Hz, 1H), 7.87–7.88 (m, 1H), 8.00 (dd, *J* = 7.5, 1.0 Hz, 1H), 8.72–8.74 (m, 1H). <sup>13</sup>C NMR (125 MHz, CDCl<sub>3</sub>): δ 29.80, 36.60, 52.61, 116.14, 117.59, 121.12, 121.15, 122.33, 123.02, 123.52, 124.67, 125.27, 126.26, 133.84, 135.44, 136.67, 137.44, 139.13, 140.28, 140.71, 147.77, 150.11, 155.48, 157.60, 165.97. HRMS (ESI): calcd for C<sub>27</sub>H<sub>24</sub>N<sub>3</sub>O<sub>2</sub> [M+H]<sup>+</sup> 422.1877, found 422.1873.

Synthesis of **L(ppp-1)**: **1-OCH<sub>3</sub>** (0.64 g, 1.55 mmol, 1.0 equiv) and NaOH (2.48 g, 62.00 mmol, 40 equiv) were added sequentially to a dry three-necked flask equipped with a magnetic stir bar. Then EtOH (30 mL) was added and the flask was placed in an oil bath and heated at 78 °C with stirring. The reaction was monitored by TLC until the reaction was completed. After 3 hours, the resulting mixture was cooled down to room temperature, filtered and add hydrochloric acid to adjust pH to 6, washed with CH<sub>2</sub>Cl<sub>2</sub>. The organic layer was separated and dried over Na<sub>2</sub>SO<sub>4</sub>, filtered, and the filtrate was concentrated under reduced pressure. The residue was purified through column chromatography on silica gel using petroleum ether/ethyl acetate = 3:1 and then ethyl acetate/CH<sub>3</sub>OH = 10:1 as eluent to afford the desired product as a maroon solid 587 mg in 93% yield. <sup>1</sup>H NMR (500 MHz, DMSO-*d*<sub>6</sub>): δ 1.63 (s, 6H), 6.64 (dd, *J* = 8.0, 1.5 Hz, 1H), 7.03 (td, *J* = 7.5, 1.5 Hz, 1H), 7.09 (td, *J* = 8.0, 2.0 Hz, 1H), 7.40 (d, *J* = 2.0 Hz, 1H), 7.43–7.46 (m, 2H), 7.53 (dd, *J* = 7.5, 1.5 Hz, 1H), 7.65 (d, *J* = 8.5 Hz, 1H), 7.77 (dd, *J* = 8.5, 2.0 Hz, 1H), 7.90–7.93 (m, 2H), 7.99 (t, *J* = 7.5 Hz, 1H), 8.03 (td, *J* = 7.5, 2.0 Hz, 1H), 8.67–8.69 (m, 1H), 12.73 (br, 1H). <sup>13</sup>C NMR (125 MHz, CDCl<sub>3</sub>): δ 30.18, 36.81, 115.71, 117.18, 120.52, 121.72, 121.96, 121.99, 122.64, 124.69, 125.05,



125.69, 126.67, 133.35, 135.15, 135.90, 139.29, 139.58, 140.28, 141.18, 145.79, 150.55, 155.45, 156.39, 164.23. HRMS (ESI): calcd for  $C_{26}H_{21}N_3O_2Na$   $[M+Na]^+$  430.1526, found 430.1520.

Synthesis of **Pt(*ppy*-1)**: A mixture of **L(*ppy*-1)** (300 mg, 0.74 mmol, 1.00 equiv) and  $K_2PtCl_4$  (336 mg, 0.81 mmol, 1.10 equiv) were added sequentially to a dry three-necked flask equipped with a magnetic stir bar. The flask was evacuated and backfilled with nitrogen, this evacuation and backfill procedure was repeated twice. Then AcOH (40 mL) and  $CHCl_3$  (4mL) were added into the flask under nitrogen atmosphere. The reaction mixture was bubbled with nitrogen for 15 minutes and then stirred at room temperature for 12 h. Then the flask was placed in an oil bath and heated at 110 °C with stirring. After 48 hours, the resulting mixture was cooled down to room temperature and concentrated in vacuum and the residue was diluted with dichloromethane. The mixture was washed with water, the organic layer was separated and dried over  $Na_2SO_4$ , filtered, and the filtrate was concentrated under reduced pressure. The residue was purified through column chromatography on silica gel using petroleum ether/dichloromethane= 2:1, and then dichloromethane/ethyl acetate/ $CH_3OH$  =1:1:0.1 as eluent to afford the desired product as a yellow solid 309 mg in 70% yield. m.p.: >320 °C.  $^1H$  NMR (500 MHz,  $DMSO-d_6$ ):  $\delta$  1.34 (s, 3H), 1.88 (s, 3H), 7.20–7.24 (m, 2H), 7.25–7.28 (m, 3H), 7.57 (dd,  $J$  = 7.5, 1.5 Hz, 1H), 7.60–7.63 (m, 2H), 7.66 (dd,  $J$  = 7.0, 1.5 Hz, 1H), 8.03–8.07 (m, 1H), 8.08–8.13 (m, 2H), 8.85 (dd,  $J$  = 6.0, 1.5 Hz, 1H).  $^{13}C$  NMR (125 MHz,  $CDCl_3$ ):  $\delta$  22.96, 31.32, 37.26, 118.29, 118.94, 119.87, 120.92, 121.29, 121.34, 122.37, 122.79, 124.31, 125.51, 126.73, 135.59, 137.12, 138.36, 139.32, 139.53, 141.41, 142.46, 150.93, 151.24, 151.79, 162.62, 172.86. HRMS (ESI): calcd for  $C_{26}H_{19}N_3O_2Na^{195}Pt$   $[M+Na]^+$  623.1017, found 623.1008. Anal. for  $C_{26}H_{19}N_3O_2Pt$ , Calcd.: C, 52.00, H, 3.19, N, 7.00; Found: C, 51.65, H, 3.20, N, 6.95.

### Synthesis of **Pt(bp-6)**:

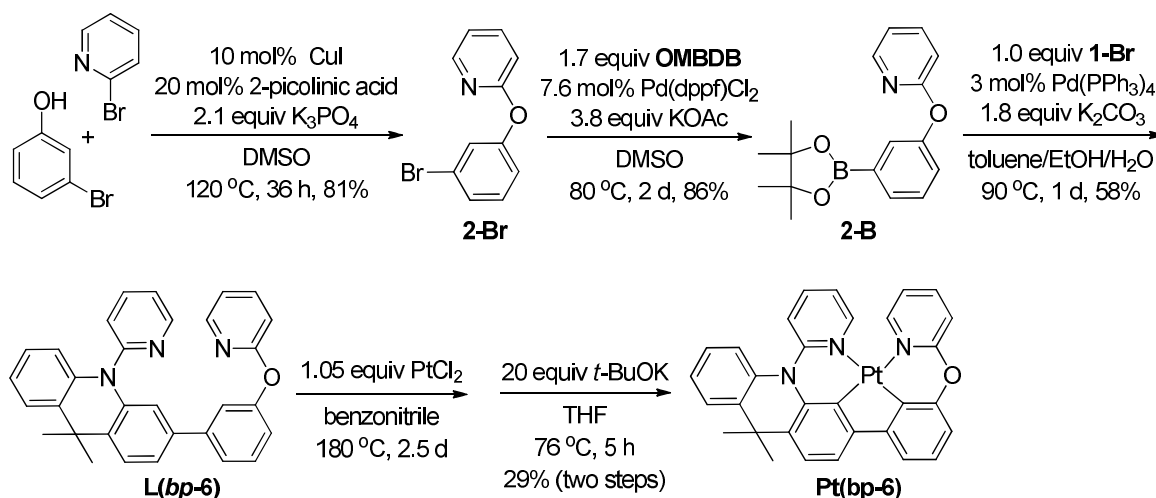

Synthesis of **2-Br**: CuI (440 mg, 2.31 mmol, 10 mol%), 2-picolinic acid (568 mg, 4.62 mmol, 20 mol%) and K<sub>3</sub>PO<sub>4</sub> (10.31 g, 48.55 mmol, 2.1 equiv) were added sequentially to a dry three-necked flask equipped with a magnetic stir bar. The flask was evacuated and backfilled with nitrogen, this evacuate ion and backfill procedure was repeated twice. Then *m*-bromophenol (4.00 g, 23.12 mmol, 1.00 equiv), 2-bromopyridine (5.48 g, 34.68 mmol, 1.50 equiv) and DMSO (30 mL) were added under nitrogen atmosphere, and then the flask was placed in an oil bath and heated at 120 °C with stirring. The reaction was monitored by TLC until the reaction was completed. After 36 hours, the resulting mixture was cooled down to room temperature, filtered and washed with ethyl acetate. The organic layer was washed with water, and then dried over Na<sub>2</sub>SO<sub>4</sub>, filtered, and the filtrate was concentrated under reduced pressure. The residue was purified through column chromatography on silica gel using petroleum ether/dichloromethane = 40:1–20:1 as eluent to afford the desired product as a white solid 4.67 g in 81% yield. <sup>1</sup>H NMR (500 MHz, CDCl<sub>3</sub>): δ 7.08 (d, *J* = 8.5 Hz, 1H), 7.14–7.18 (m, 2H), 7.36–7.43 (m, 3H), 7.86–7.90 (m, 1H), 7.08 (ddd, *J* = 4.5, 2.0, 0.5 Hz, 1H). <sup>13</sup>C NMR (125 MHz, CDCl<sub>3</sub>): δ 111.81, 118.96, 119.85, 122.58, 124.45, 127.66, 130.62, 139.61, 147.67, 154.84, 163.06. HRMS (ESI): calcd for C<sub>11</sub>H<sub>9</sub>NOBr [M+H]<sup>+</sup> 249.9862, found 249.9862.

Synthesis of **2-B**: 2-(3-Bromophenoxy)pyridine **2-Br** (4.00 g, 16.00 mmol, 1.00 equiv), **OMBDB** (6.92 g, 27.25 mmol, 1.70 equiv), Pd(dppf)Cl<sub>2</sub> (886 mg, 1.21 mmol, 7.6 mol%), KOAc (5.94 g, 60.53 mmol, 3.8 equiv) were added sequentially to a dry three-necked flask equipped with a magnetic stir bar. The flask was evacuated and backfilled with nitrogen, this evacuation and backfill

procedure was repeated twice. Then DMSO (45 mL) was added under nitrogen atmosphere, and then the flask was placed in an oil bath and heated at 80 °C with stirring. The reaction was monitored by TLC until the reaction was completed. After 2 days, the resulting mixture was cooled down to room temperature, filtered and washed with ethyl acetate. The organic layer was washed with water, and then dried over Na<sub>2</sub>SO<sub>4</sub>, filtered, and the filtrate was concentrated under reduced pressure. The residue was purified through column chromatography on silica gel using petroleum ether/ethyl acetate = 20:1–14:1 as eluent to afford the desired product as a white solid 4.07 g in 86% yield. <sup>1</sup>H NMR (500 MHz, CDCl<sub>3</sub>): δ 1.33 (s, 12 H), 6.87–6.89 (m, 1H), 6.95–6.99 (m, 1H), 7.24 (ddd, *J* = 4.0, 3.0, 1.5 Hz, 1H), 7.41 (t, *J* = 7.5 Hz, 1H), 7.56 (dd, *J* = 2.5, 1.0 Hz, 1H), 7.64–7.66 (m, 1H), 7.67–7.68 (m, 1H), 8.19 (ddd, *J* = 3.0, 2.0, 1.0 Hz, 1H). <sup>13</sup>C NMR (125 MHz, CDCl<sub>3</sub>): δ 24.82, 83.88, 111.36, 118.22, 124.35, 127.16, 129.15, 131.15, 139.33, 147.67, 153.62, 163.88. HRMS (ESI): calcd for C<sub>17</sub>H<sub>21</sub>NO<sub>3</sub>B [M+H]<sup>+</sup> 298.1609, found 298.1623.

Synthesis of **L(bp-6)**: 3-Bromo-9,9-dimethyl-10-(pyridin-2-yl)-9,10-dihydroacridine **1-Br** (1.30 g, 3.57 mmol, 1.00 equiv), 2-(3-(4,4,5,5-tetramethyl-1,3,2-dioxaborolan-2-yl)phenoxy) pyridine **2-B** (1.16 g, 3.93 mmol, 1.10 equiv), Pd(PPh<sub>3</sub>)<sub>4</sub> (124 mg, 0.11 mmol, 3 mol%), K<sub>2</sub>CO<sub>3</sub> (888 mg, 6.43 mmol, 1.8 equiv) were added sequentially to a dry three-necked flask equipped with a magnetic stir bar. Then toluene (25 mL), EtOH (5 mL) and H<sub>2</sub>O (5 mL) were added, and then the flask was placed in an oil bath and heated at 90 °C with stirring. The reaction was monitored by TLC until the reaction was completed. After 1 day, the resulting mixture was cooled down to room temperature, filtered and washed with ethyl acetate. The organic layer was separated and washed with water, then dried over Na<sub>2</sub>SO<sub>4</sub>, filtered, and the filtrate was concentrated under reduced pressure. The residue was purified through column chromatography on silica gel using petroleum ether/ethyl acetate = 10:1–5:1 as eluent to afford the desired product as a white solid 950 mg in 58% yield. <sup>1</sup>H NMR (500 MHz, CDCl<sub>3</sub>): δ 1.68 (s, 6H), 6.78 (dd, *J* = 8.0, 1.5 Hz, 1H), 6.89 (dt, *J* = 8.5, 1.5 Hz, 1H), 6.97–6.98 (m, 1H), 6.99–7.01 (m, 1H), 7.00–7.09 (m, 3H), 7.20–7.25 (m, 3H), 7.27 (dt, *J* = 6.5, 1.0 Hz, 1H), 7.33 (dt, *J* = 8.0, 2.0 Hz, 1H), 7.37 (t, *J* = 8.0 Hz, 1H), 7.47 (dd, *J* = 8.0, 2.0 Hz, 1H), 7.48 (d, *J* = 9.5 Hz, 1H), 7.66–7.69 (m, 1H), 7.82 (td, *J* = 8.0, 2.0 Hz, 1H), 8.18–8.20 (m, 1H), 8.68 (dd, *J* = 9.5, 1.5 Hz, 1H). <sup>13</sup>C NMR (125 MHz, CDCl<sub>3</sub>): δ 29.49, 35.86, 110.96, 115.53, 116.79, 117.90, 118.99, 119.16, 120.46, 120.69, 120.72, 121.64, 122.80, 124.16, 124.62, 125.66, 129.13, 132.75, 133.19,

138.05, 138.60, 138.80, 139.71, 140.06, 142.45, 147.24, 149.69, 153.86, 154.85, 163.11. HRMS (ESI): calcd for  $C_{31}H_{26}N_3O$   $[M+H]^+$  456.2070, found 456.2068.

Synthesis of **Pt(bp-6)**: A mixture of **L(bp-6)** (250 mg, 0.55 mmol, 1.00 equiv) and  $PtCl_2$  (153 mg, 0.58 mmol, 1.05 equiv) were added sequentially to a dry three-necked flask equipped with a magnetic stir bar. The flask was evacuated and backfilled with nitrogen, this evacuation and backfill procedure was repeated twice. Then benzonitrile (30 mL) was added into the flask, and the flask was placed in an oil bath and heated at 180 °C with stirring. After 2.5 days, the mixture was cooled to room temperature. THF (12 mL) and *t*-BuOK (1.23 g, 10.98 mmol, 20.00 equiv) were added to the mixture under nitrogen atmosphere and stirred in an oil bath held at 76 °C for 5 h. The resulting mixture was cooled down to room temperature and concentrated in vacuum. The residue was diluted with dichloromethane, and washed with water. The organic layer was separated, and the aqueous phase was extracted with dichloromethane twice. The combined organic layer was dried over anhydrous  $Na_2SO_4$ , filtered, and the filtrate was concentrated under reduced pressure. The crude solid was purified through column chromatography on silica gel using petroleum ether/dichloromethane = 3:1–1:1 as eluent to afford the desired product as a yellow solid 104 mg in 29% yield. m.p.: 314.5–315.5 °C.  $^1H$  NMR (500 MHz,  $DMSO-d_6$ ):  $\delta$  1.27 (s, 3H), 1.84 (s, 3H), 6.75 (dd,  $J$  = 8.0, 1.0 Hz, 1H), 6.91–6.98 (m, 2H), 7.10–7.14 (m, 2H), 7.19 (td,  $J$  = 8.5, 1.5 Hz, 1H), 7.21–7.24 (m, 2H), 7.28 (dd,  $J$  = 8.0, 1.5 Hz, 1H), 7.33–7.35 (m, 1H), 7.44 (d,  $J$  = 8.5 Hz, 1H), 7.48 (dt,  $J$  = 8.5, 1.0 Hz, 1H), 7.53 (dd,  $J$  = 8.0, 2.0 Hz, 1H), 7.93–7.98 (m, 1H), 8.16–8.21 (m, 1H), 8.60 (dd,  $J$  = 6.0, 2.0 Hz, 1H), 8.66 (dd,  $J$  = 6.0, 2.0 Hz, 1H).  $^{13}C$  NMR (125 MHz,  $DMSO-d_6$ ):  $\delta$  22.72, 32.33, 36.29, 113.26, 116.06, 116.18, 118.12, 119.75, 119.88, 120.53, 120.90, 123.80, 124.26, 122.80, 124.54, 126.48, 128.43, 132.33, 135.28, 137.09, 138.21, 139.27, 140.19, 141.48, 148.89, 150.39, 151.74, 154.07, 156.96, 157.51. HRMS (ESI): calcd for  $C_{31}H_{23}N_3ONa^{195}Pt$   $[M+Na]^+$  671.1381, found 671.1384. Anal. for  $C_{31}H_{23}N_3OPt \cdot 0.5H_2O$ , Calcd.: C, 56.62, H, 3.68, N, 6.39; Found: C, 56.65, H, 3.70, N, 6.26.

### Synthesis of **Pt(bp-7)**:

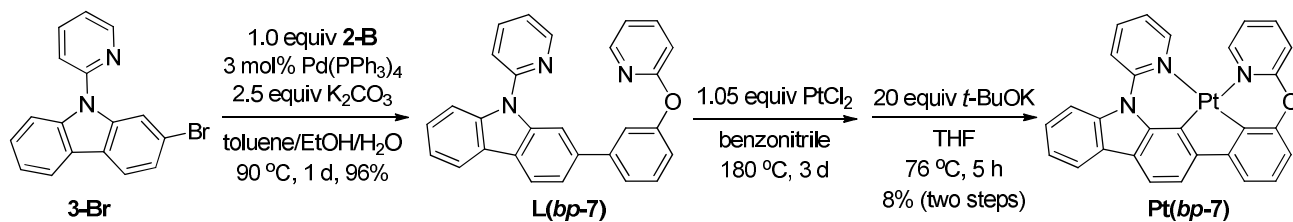

Synthesis of **L(bp-7)**: 2-(3-(4,4,5,5-Tetramethyl-1,3,2-dioxaborolan-2-yl)phenoxy)pyridine **2-B** (1.00 g, 3.4 mmol, 1.0 equiv), 2-bromo-9-(pyridin-2-yl)-9*H*-carbazole **3-Br**<sup>6</sup> (1.20 g, 3.7 mmol, 1.1 equiv), Pd(PPh<sub>3</sub>)<sub>4</sub> (116 mg, 0.10 mmol, 3 mol%), K<sub>2</sub>CO<sub>3</sub> (1.16 g, 8.4 mmol, 2.5 equiv) were added sequentially to a dry three-necked flask equipped with a magnetic stir bar. The flask was evacuated and backfilled with nitrogen, this evacuation and backfill procedure was repeated twice. Then toluene (20 mL), EtOH (4 mL) and H<sub>2</sub>O (4 mL) were added, and then the flask was placed in an oil bath and heated at 90 °C with stirring. The reaction was monitored by TLC until the reaction was completed. After 24 hours, the resulting mixture was cooled down to room temperature, filtered and washed with ethyl acetate. The organic layer was washed with water, and then dried over Na<sub>2</sub>SO<sub>4</sub>, filtered, and the filtrate was concentrated under reduced pressure. The residue was purified through column chromatography on silica gel using petroleum ether/ethyl acetate = 10:1–5:1 as eluent to afford the desired product as a white solid 1.32 g in 96% yield. <sup>1</sup>H NMR (500 MHz, CDCl<sub>3</sub>): δ 6.94 (dd, *J* = 8.5 Hz, 1H), 7.00 (ddd, *J* = 6.0, 5.0, 1.0 Hz, 1H), 7.10–7.13 (m, 1H), 7.30–7.34 (m, 2H), 7.42–7.45 (m, 2H), 7.47 (d, *J* = 8.0, 1.0 Hz, 1H), 7.51 (dt, *J* = 7.5, 1.0 Hz, 1H), 7.55 (dd, *J* = 8.0, 1.5 Hz, 1H), 7.64–7.66 (m, 1H), 7.67–7.70 (m, 1H), 7.82 (dd, *J* = 7.5, 1.0 Hz, 1H), 7.94 (td, *J* = 8.0 Hz, 1H), 8.02 (m, 1H), 8.12 (d, *J* = 7.5, 1.0 Hz, 1H), 8.15 (d, *J* = 8.0 Hz, 1H), 8.20–8.23 (m, 1H), 8.72–8.75 (m, 1H). <sup>13</sup>C NMR (125 MHz, CDCl<sub>3</sub>): δ 109.95, 111.26, 111.66, 118.65, 119.36, 119.89, 120.40, 120.48, 120.55, 120.73, 121.20, 121.51, 123.88, 124.11, 124.14, 126.44, 129.99, 138.71, 139.08, 139.57, 140.21, 140.27, 144.04, 147.98, 149.89, 151.86, 154.67, 163.93. HRMS (ESI): calcd for C<sub>28</sub>H<sub>20</sub>N<sub>3</sub>O [M+H]<sup>+</sup> 414.1601, found 414.1596.

Synthesis of **Pt(bp-7)**: A mixture of **L(bp-7)** (350 mg, 0.85 mmol, 1.00 equiv) and PtCl<sub>2</sub> (236 mg, 0.89 mmol, 1.05 equiv) were added sequentially to a dry three-necked flask equipped with a magnetic stir bar. The flask was evacuated and backfilled with nitrogen, this evacuation and backfill procedure was repeated twice. Then benzonitrile (40 mL) was added into the flask, and the flask was

placed in an oil bath and heated at 180 °C with stirring. After 3 days, the mixture was cooled to room temperature. THF (15 mL) and *t*-BuOK (1.90 g, 16.93 mmol, 20.00 equiv) were added to the mixture under nitrogen atmosphere and stirred in an oil bath at 76 °C for 5 h. The resulting mixture was cooled down to room temperature and concentrated in vacuum. The residue was diluted with dichloromethane, and washed with water. The organic layer was separated, and the aqueous phase was extracted with dichloromethane twice. The combined organic layer was dried over anhydrous Na<sub>2</sub>SO<sub>4</sub>, filtered, and the filtrate was concentrated under reduced pressure. The crude solid was purified through column chromatography on silica gel using petroleum ether/dichloromethane = 3:1–1:1 as eluent to afford the desired product as a yellow solid 40 mg in 8% yield. m.p.: 317.6–318.9 °C. <sup>1</sup>H NMR (500 MHz, DMSO-*d*<sub>6</sub>): δ 6.75 (dd, *J* = 8.0, 1.0 Hz, 1H), 6.94 (t, *J* = 7.5 Hz, 1H), 7.18 (dd, *J* = 7.5, 1.0 Hz, 1H), 7.31–7.34 (m, 2H), 7.35–7.41 (m, 2H), 7.45–7.49 (m, 1H), 7.52 (dd, *J* = 7.5, 1.0 Hz, 1H), 7.60 (d, *J* = 7.5 Hz, 1H), 8.03 (d, *J* = 8.0 Hz, 1H), 8.10 (dd, *J* = 7.5, 1.5 Hz, 1H), 8.15–8.22 (m, 2H), 8.28 (d, *J* = 8.5 Hz, 1H), 8.70 (dd, *J* = 6.0, 1.0 Hz, 1H), 8.78 (dd, *J* = 6.0, 1.5 Hz, 1H). <sup>13</sup>C NMR (150 MHz, DMSO-*d*<sub>6</sub>): δ 113.91, 114.23, 114.91, 116.44, 116.50, 116.62, 120.16, 120.62, 120.95, 122.76, 124.94, 125.91, 127.67, 128.15, 129.11, 138.50, 139.54, 140.04, 140.64, 148.98, 152.17, 152.63, 152.68, 156.98, 158.37. HRMS (DART positive ion mode): calcd for C<sub>28</sub>H<sub>18</sub>ON<sub>3</sub>Pt [M+H]<sup>+</sup> 607.1092, found 607.1092. Anal. for C<sub>28</sub>H<sub>17</sub>ON<sub>3</sub>Pt•0.5CH<sub>2</sub>Cl<sub>2</sub>, Calcd.: C, 52.74, H, 2.80, N, 6.47; Found: C, 53.05, H, 2.95, N, 6.44.

Improved synthesis of **Pt(bp-7)**:

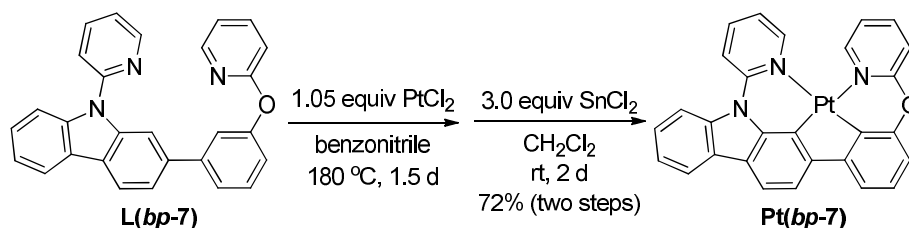

A mixture of L(bp-7) (200 mg, 0.48 mmol, 1.00 equiv) and PtCl<sub>2</sub> (135 mg, 0.51 mmol, 1.05 equiv) were added sequentially to a dry three-necked flask equipped with a magnetic stir bar. The flask was evacuated and back-filled with nitrogen, this evacuation and backfill procedure was repeated twice. The flask was evacuated and backfilled with nitrogen, this evacuation and backfill procedure was repeated twice. Then benzonitrile (30 mL) was added into the flask, and the flask was placed in an oil bath and heated at 180 °C with stirring. After 36 hours, the mixture was cooled to

room temperature and concentrated in vacuum. The residue was diluted with dichloromethane, and washed with water. The organic layer was separated, and the aqueous phase was extracted with dichloromethane twice. The combined organic layer was dried over anhydrous  $\text{Na}_2\text{SO}_4$ , filtered, and the filtrate was concentrated under reduced pressure. The crude product and anhydrous  $\text{SnCl}_2$  (274 mg, 1.45 mmol, 3.00 equiv) were added to a dry three-necked flask equipped with a magnetic stir bar. The flask was evacuated and backfilled with nitrogen, this evacuation and backfill procedure was repeated twice. Then dichloroethane (30 mL) was added under nitrogen atmosphere and stirred at room temperature for two days. Then the mixture was washed with water, separated and the aqueous phase was extracted with dichloromethane. The combined organic layer was dried over anhydrous  $\text{Na}_2\text{SO}_4$ , filtered, and the filtrate was concentrated under reduced pressure. The crude solid was purified through column chromatography on silica gel using petroleum ether/dichloromethane = 3:1–2:1 as eluent to afford the desired product as a yellow solid 213 mg in 72% yield.  $^1\text{H}$  NMR (500 MHz,  $\text{DMSO}-d_6$ ):  $^1\text{H}$  NMR (500 MHz,  $\text{DMSO}-d_6$ ):  $\delta$  6.75 (dd,  $J$  = 8.0, 1.0 Hz, 1H), 6.93 (t,  $J$  = 7.5 Hz, 1H), 7.17 (dd,  $J$  = 7.0, 1.0 Hz, 1H), 7.30–7.33 (m, 2H), 7.34–7.40 (m, 2H), 7.47 (td,  $J$  = 8.0, 1.0 Hz, 1H), 7.52 (dd,  $J$  = 8.5, 1.0 Hz, 1H), 7.60 (d,  $J$  = 7.5 Hz, 1H), 8.02 (d,  $J$  = 8.5 Hz, 1H), 8.08–8.11 (m, 1H), 8.16–8.22 (m, 2H), 8.27 (d,  $J$  = 8.5 Hz, 1H), 8.69 (dd,  $J$  = 6.0, 2.0 Hz, 1H), 8.78 (dd,  $J$  = 6.0, 2.0 Hz, 1H). The  $^1\text{H}$  NMR is agreement with the data obtained above.

#### Synthesis of **Pt(bp-8)**:

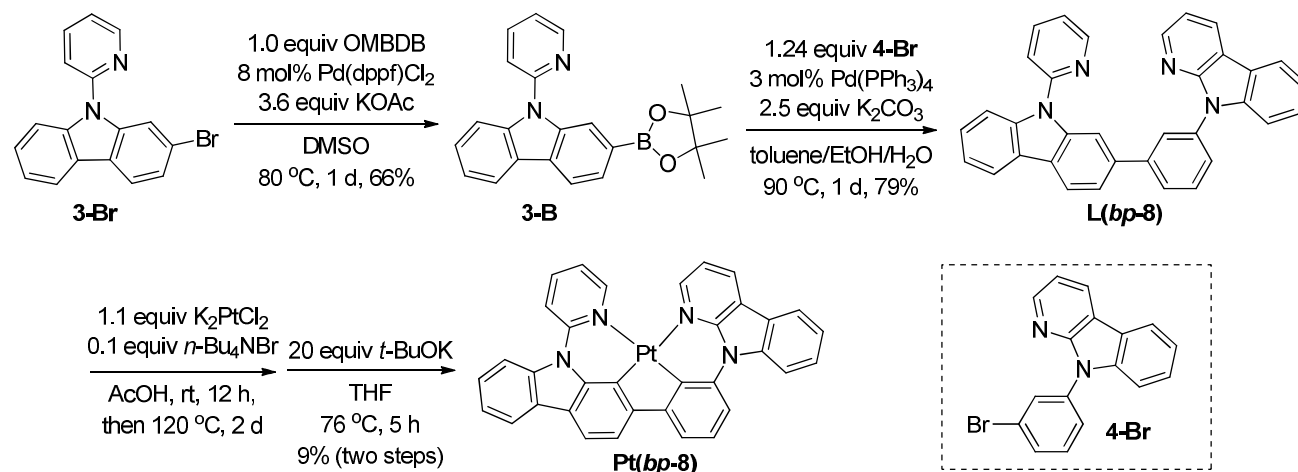

Synthesis of **3-B**: 2-Bromo-9-(pyridin-2-yl)-9H-carbazole **3-Br**<sup>6</sup> (1.50 g, 4.64 mmol, 1.02 equiv), **OMBDB** (1.15 g, 4.53 mmol, 1.00 equiv),  $\text{Pd}(\text{dppf})\text{Cl}_2$  (263 mg, 0.36 mmol, 8 mol%), KOAc (1.62 g, 16.48 mmol, 3.6 equiv) were added sequentially to a dry three-necked flask equipped with a

magnetic stir bar. The flask was evacuated and backfilled with nitrogen, this evacuation and backfill procedure was repeated twice. Then DMSO (20 mL) were added under nitrogen atmosphere, and then the flask was placed in an oil bath and heated at 80 °C with stirring. The reaction was monitored by TLC until the reaction was completed. After 1 day, the resulting mixture was cooled down to room temperature, filtered and washed with ethyl acetate. The organic layer was washed with water, and then dried over Na<sub>2</sub>SO<sub>4</sub>, filtered, and the filtrate was concentrated under reduced pressure. The residue was purified through column chromatography on silica gel using petroleum ether/ethyl acetate = 20:1–10:1 as eluent to afford the desired product as a white solid 1.10 g in 72% yield. <sup>1</sup>H NMR (500 MHz, CDCl<sub>3</sub>): δ 1.34 (s, 12H), 7.22 (dd, *J* = 7.5, 5.0 Hz, 1H), 7.30–7.34 (m, 1H), 7.42 (dt, *J* = 8.0, 1.0 Hz, 1H), 7.45–7.48 (m, 1H), 7.63 (t, *J* = 8.0 Hz, 1H), 7.72 (ddd, *J* = 7.5, 2.0, 1.0 Hz, 1H), 7.92 (dt, *J* = 7.5, 1.5 Hz, 1H), 8.03 (dd, *J* = 2.5, 1.0 Hz, 1H), 8.12 (dt, *J* = 7.5, 1.0 Hz, 1H), 8.38 (dd, *J* = 7.5, 1.5 Hz, 1H), 8.48 (dd, *J* = 4.5, 1.5 Hz, 1H). <sup>13</sup>C NMR (125 MHz, CDCl<sub>3</sub>) : δ 24.87, 83.76, 111.19, 117.04, 119.47, 119.49, 120.54, 120.82, 121.30, 123.94, 126.77, 127.07, 138.61, 139.12, 140.13, 149.67, 151.64. HRMS (ESI): calcd for C<sub>23</sub>H<sub>24</sub>N<sub>2</sub>O<sub>2</sub>B [M+H]<sup>+</sup> 371.1925, found 371.1945.

Synthesis of **L(bp-8)**: **3-B** (1.00 g, 2.70 mmol, 1.00 equiv), **4-Br**<sup>5</sup> (1.08 g, 3.34 mmol, 1.24 equiv), Pd(PPh<sub>3</sub>)<sub>4</sub> (94 mg, 0.08 mmol, 3 mol%), K<sub>2</sub>CO<sub>3</sub> (933 mg, 6.75 mmol, 2.50 equiv) were added sequentially to a dry three-necked flask equipped with a magnetic stir bar. Then toluene (20 mL), EtOH (4 mL) and H<sub>2</sub>O (4 mL) were added, then the flask was placed in an oil bath and heated at 90 °C with stirring. The reaction was monitored by TLC until the reaction was completed. After 24 hours, the resulting mixture was cooled down to room temperature, filtered and washed with ethyl acetate. The organic layer was washed with water, and then dried over Na<sub>2</sub>SO<sub>4</sub>, filtered, and the filtrate was concentrated under reduced pressure. The residue was purified through column chromatography on silica gel using petroleum ether/ethyl acetate = 10:1–3:1 as eluent to afford the desired product as a white solid 1.04 g in 79% yield. <sup>1</sup>H NMR (500 MHz, CDCl<sub>3</sub>): δ 7.28–7.34 (m, 2H), 7.33–7.37 (m, 2H), 7.43–7.46 (m, 1H), 7.46–7.49 (m, 1H), 7.56 (d, *J* = 8.0 Hz, 1H), 7.63 (dd, *J* = 8.0, 1.5 Hz, 2H), 7.66–7.71 (m, 2H), 7.77 (dt, *J* = 3.0, 1.5 Hz, 1H), 7.83 (d, *J* = 8.0 Hz, 1H), 7.91–7.95 (m, 2H), 8.08 (d, *J* = 1.0 Hz, 1H), 8.14 (t, *J* = 7.5, 1.5 Hz, 2H), 8.18 (d, *J* = 8.0 Hz, 1H), 8.41 (dd, *J* = 7.5, 1.5 Hz, 1H), 8.49 (d, *J* = 5.0, 2.0 Hz, 1H), 8.71 (m, 1H). <sup>13</sup>C NMR (125 MHz, CDCl<sub>3</sub>): δ 109.99, 110.55, 111.15, 116.11, 116.41, 119.24, 120.32, 120.53, 120.71, 120.78, 120.89, 120.96, 121.10, 121.40, 123.85, 124.01, 126.08, 126.37, 126.51, 126.96, 127.00, 128.32, 129.98,



136.68, 138.59, 138.88, 140.14, 140.17, 140.18, 143.74, 146.54, 149.77, 151.73, 152.03. HRMS (ESI): calcd for  $C_{34}H_{23}N_4 [M+H]^+$  487.1917, found 487.1914.

**Synthesis of Pt(*bp*-8):** A mixture of **L(*bp*-8)** (200 mg, 0.41 mmol, 1.00 equiv),  $K_2PtCl_4$  (188 mg, 0.45 mmol, 1.10 equiv) and *n*-Bu<sub>4</sub>NBr (13 mg, 0.04 mmol, 0.1 equiv) were added sequentially to a dry three-necked flask equipped with a magnetic stir bar. The flask was evacuated and backfilled with nitrogen, this evacuation and backfill procedure was repeated twice. Then AcOH (30 mL) were added into the flask under nitrogen atmosphere at room temperature. The reaction mixture was bubbled with nitrogen for 30 minutes and then stirred at room temperature for 12 h. Then the flask was placed in an oil bath and heated at 120 °C with stirring. After two days, the resulting mixture was cooled down to room temperature and concentrated in vacuum and the residue was diluted with dichloromethane. The mixture was washed with water, the organic layer was separated and dried over anhydrous Na<sub>2</sub>SO<sub>4</sub>, filtered, and the filtrate was concentrated under reduced pressure. The residue obtained in last step, THF (15 mL) and *t*-BuOK (460 mg, 4.1 mmol, 10.00 equiv) were added to the mixture under nitrogen atmosphere and stirred in an oil bath at 76 °C for 5 h. The resulting mixture was cooled down to room temperature and concentrated in vacuum. The residue was diluted with dichloromethane, and washed with water. The organic layer was separated, and the aqueous phase was extracted with dichloromethane twice. The combined organic layer was dried over anhydrous Na<sub>2</sub>SO<sub>4</sub>, filtered, and the filtrate was concentrated under reduced pressure. The crude solid was purified through column chromatography on silica gel using petroleum ether/dichloromethane = 3:1–1:1 as eluent to afford the desired product as a yellow solid 25 mg in 9% yield. m.p.: 221.1–222.0 °C. <sup>1</sup>H NMR (500 MHz, DMSO-*d*<sub>6</sub>): δ 7.07–7.11 (m, 1H), 7.23–7.27 (m, 1H), 7.32 (d, *J* = 7.0 Hz, 1H), 7.37 (t, *J* = 8.0 Hz, 1H), 7.42 (d, *J* = 8.0 Hz, 1H), 7.46–7.50 (m, 1H), 7.51–7.54 (t, *J* = 7.5 Hz, 1H), 7.61–7.66 (m, 3H), 7.69–7.73 (m, 1H), 8.04 (d, *J* = 8.5 Hz, 1H), 8.11–8.13 (m, 1H), 8.15–8.19 (m, 1H), 8.25–8.31 (t, *J* = 6.5 Hz, 2H), 8.45–8.48 (m, 1H), 8.53–8.56 (dd, *J* = 6.0, 2.0 Hz, 1H), 8.88 (dd, *J* = 5.5, 1.5 Hz, 1H), 9.05 (dd, *J* = 7.5, 1.5 Hz, 1H). <sup>13</sup>C NMR (150 MHz, DMSO-*d*<sub>6</sub>): δ 113.97, 114.89, 115.60, 116.42, 116.66, 116.73, 118.38, 119.64, 119.84, 120.65, 120.88, 121.97, 122.16, 122.36, 122.71, 124.43, 125.88, 127.85, 128.11, 129.50, 130.50, 135.63, 136.10, 138.26, 138.30, 139.36, 139.68, 146.39, 146.44, 149.00, 152.44, 153.61, 157.00. HRMS (DART positive ion mode): calcd for  $C_{34}H_{21}N_4Pt [M+H]^+$  680.1408, found 680.1411. Anal. for  $C_{34}H_{20}N_4Pt$ , Calcd.: C, 60.09, H, 2.97, N, 8.24; Found: C, 59.60, H, 3.30, N, 7.88.

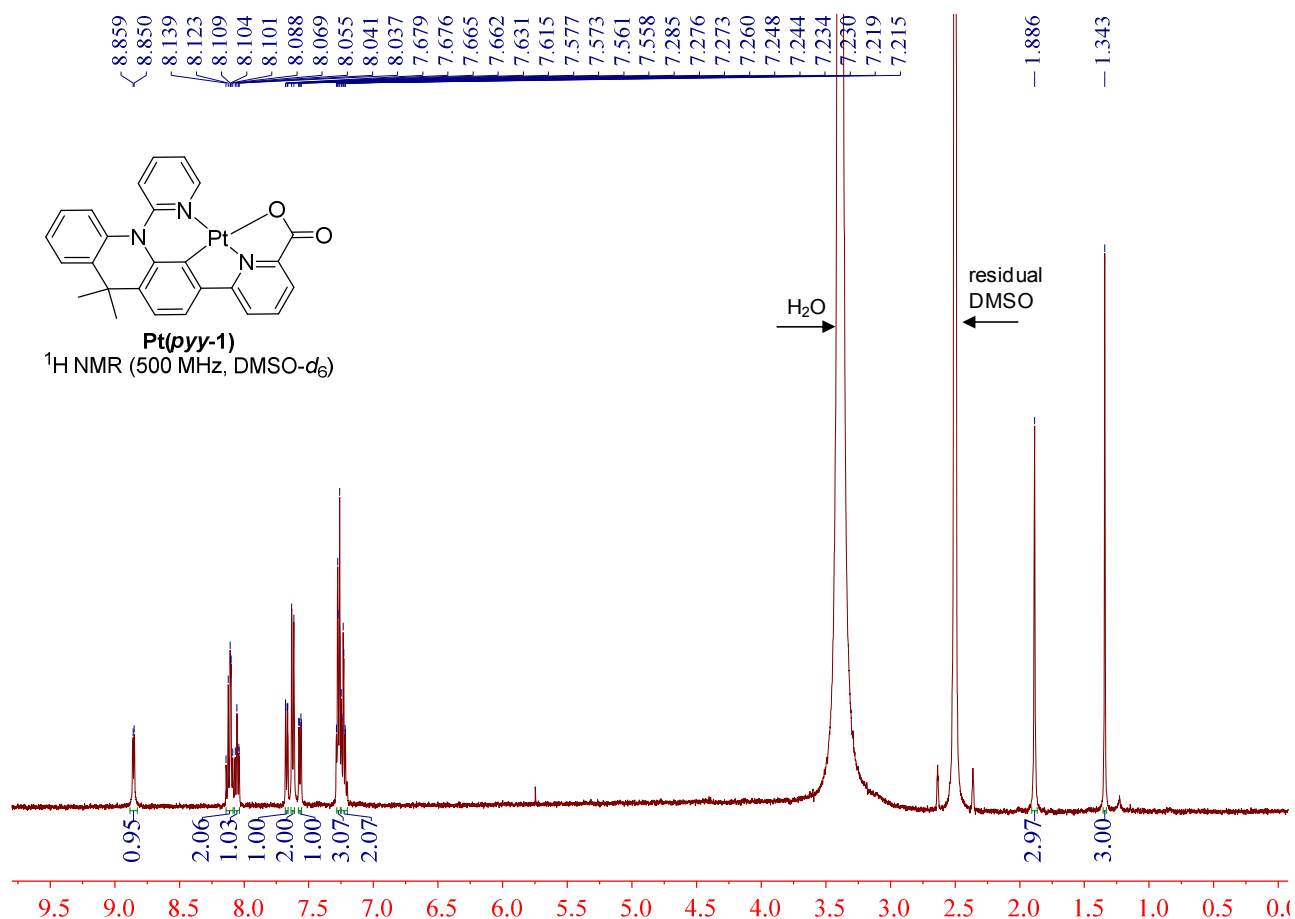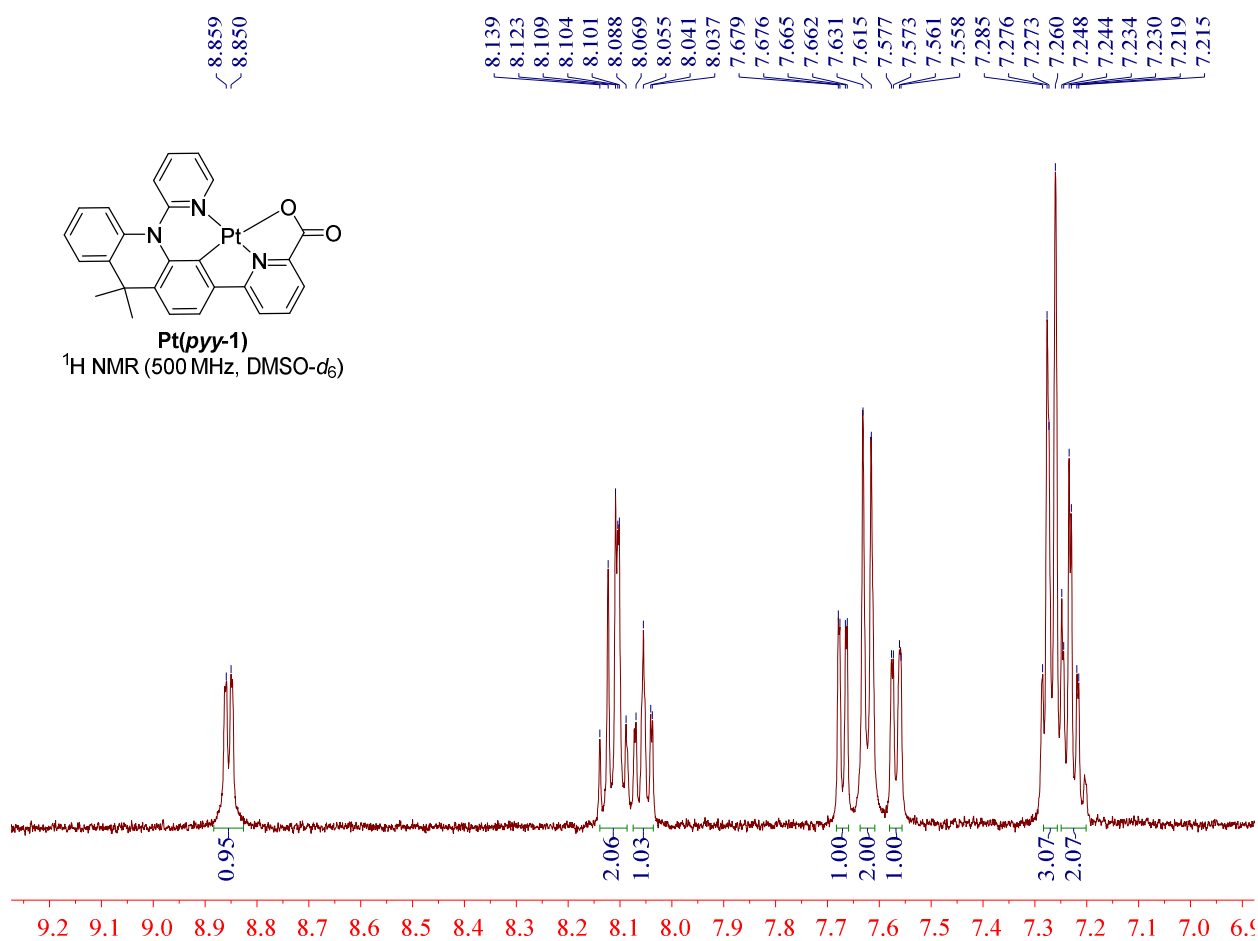

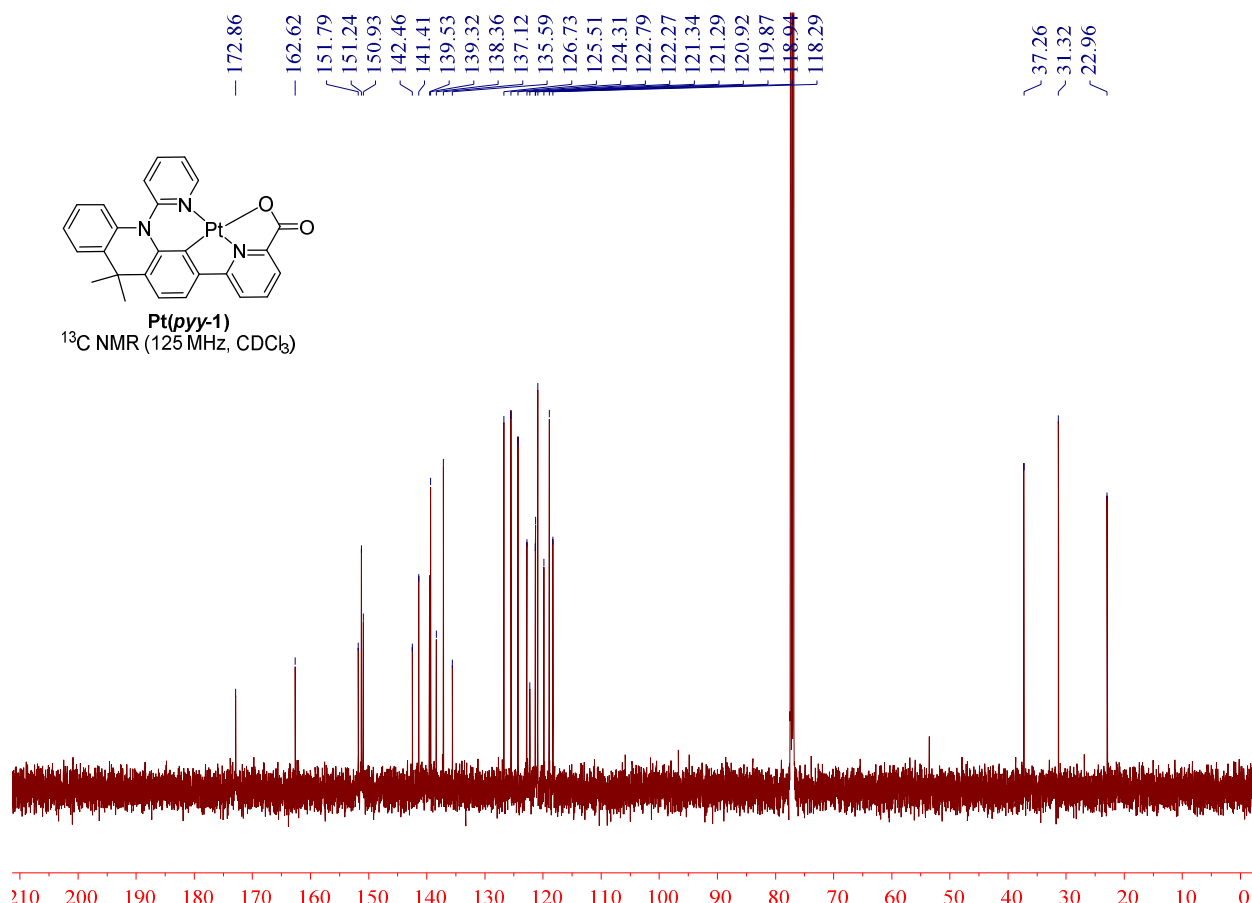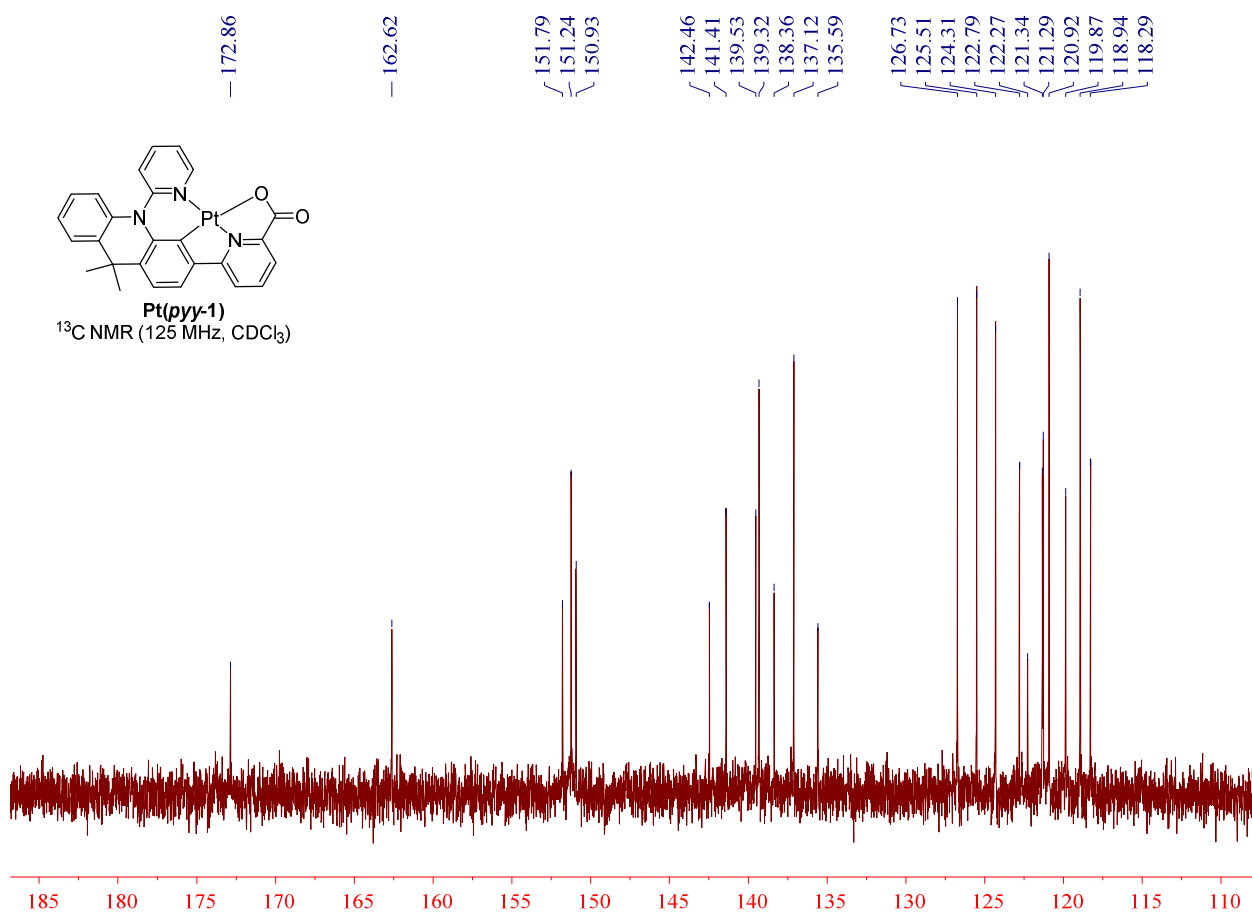

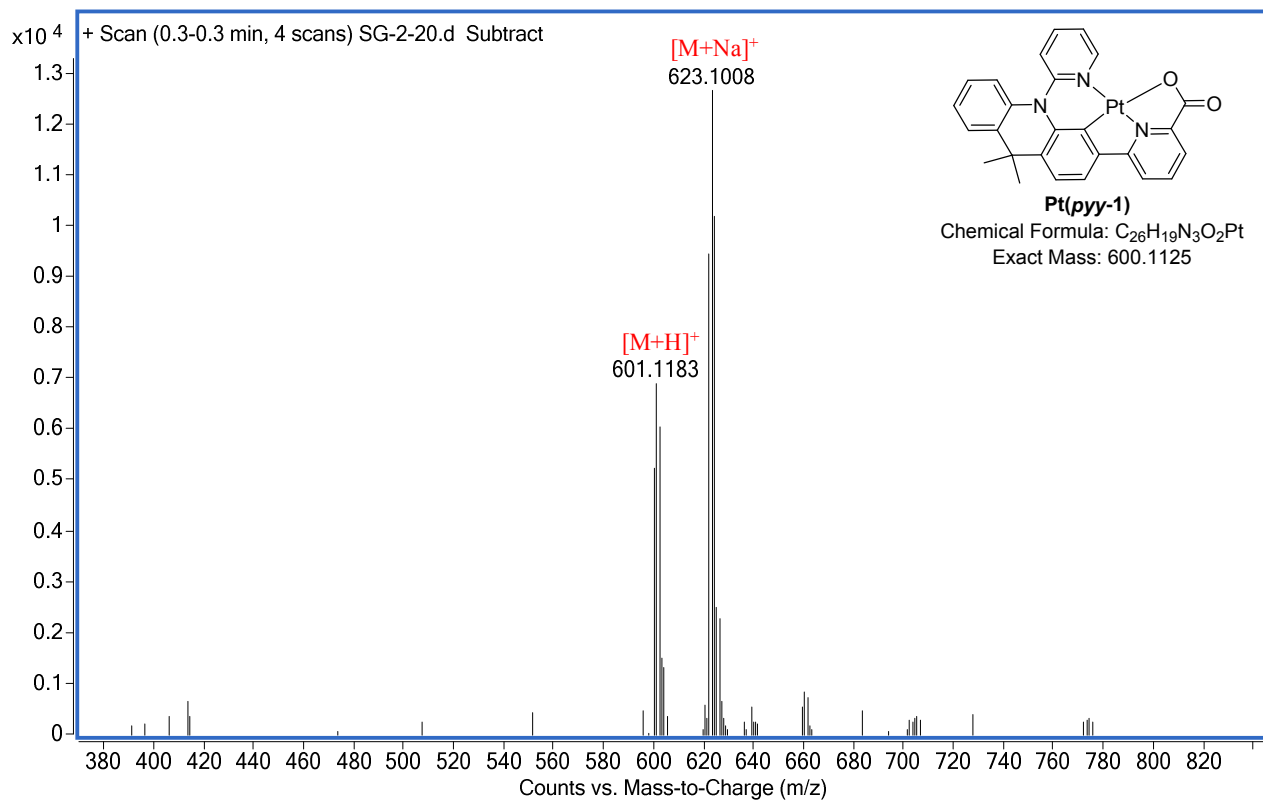

| Formula(M)                      | Ion Formula                       | m/z      | Calc m/z | Error (ppm) |
|---------------------------------|-----------------------------------|----------|----------|-------------|
| $C_{26}H_{19}N_3O_2 [^{195}Pt]$ | $C_{26}H_{19}N_3NaO_2 [^{195}Pt]$ | 623.1008 | 623.1017 | 1.54        |

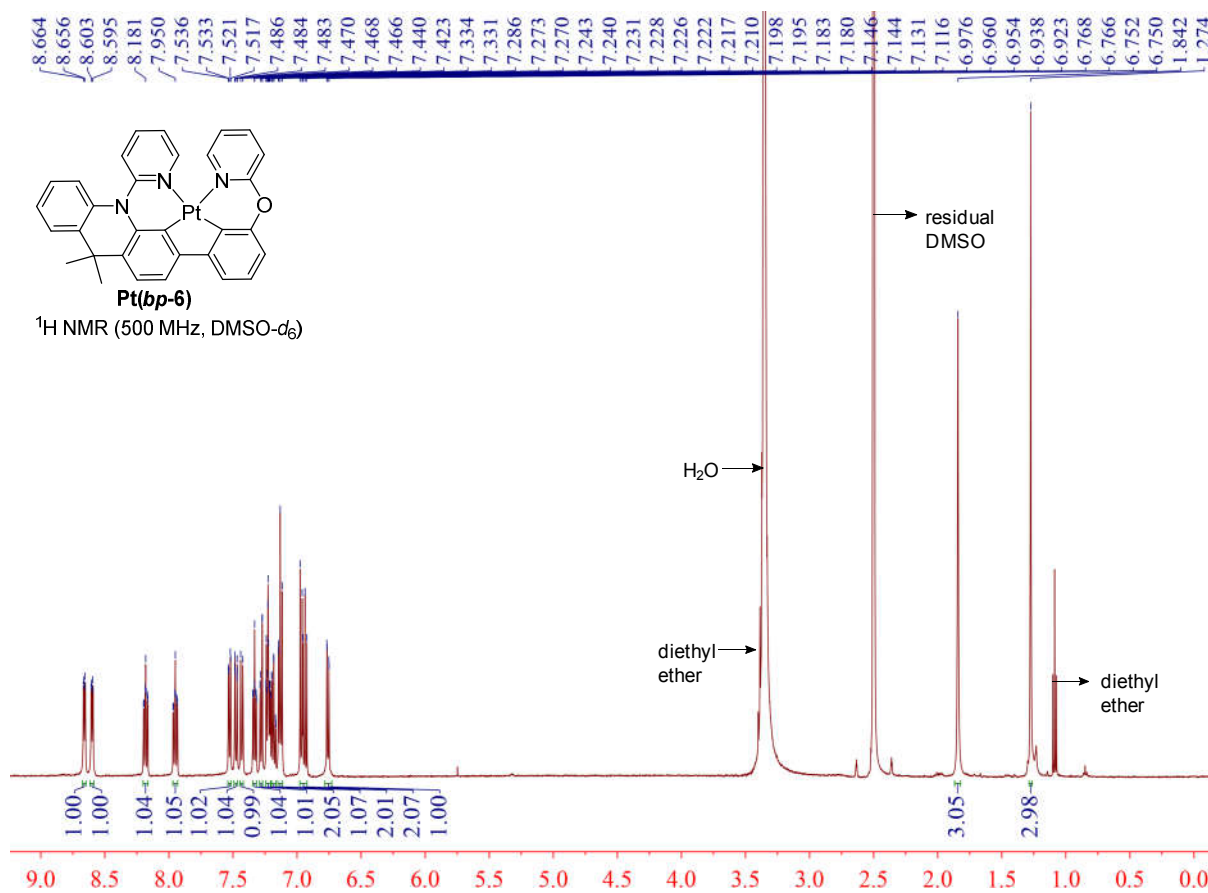

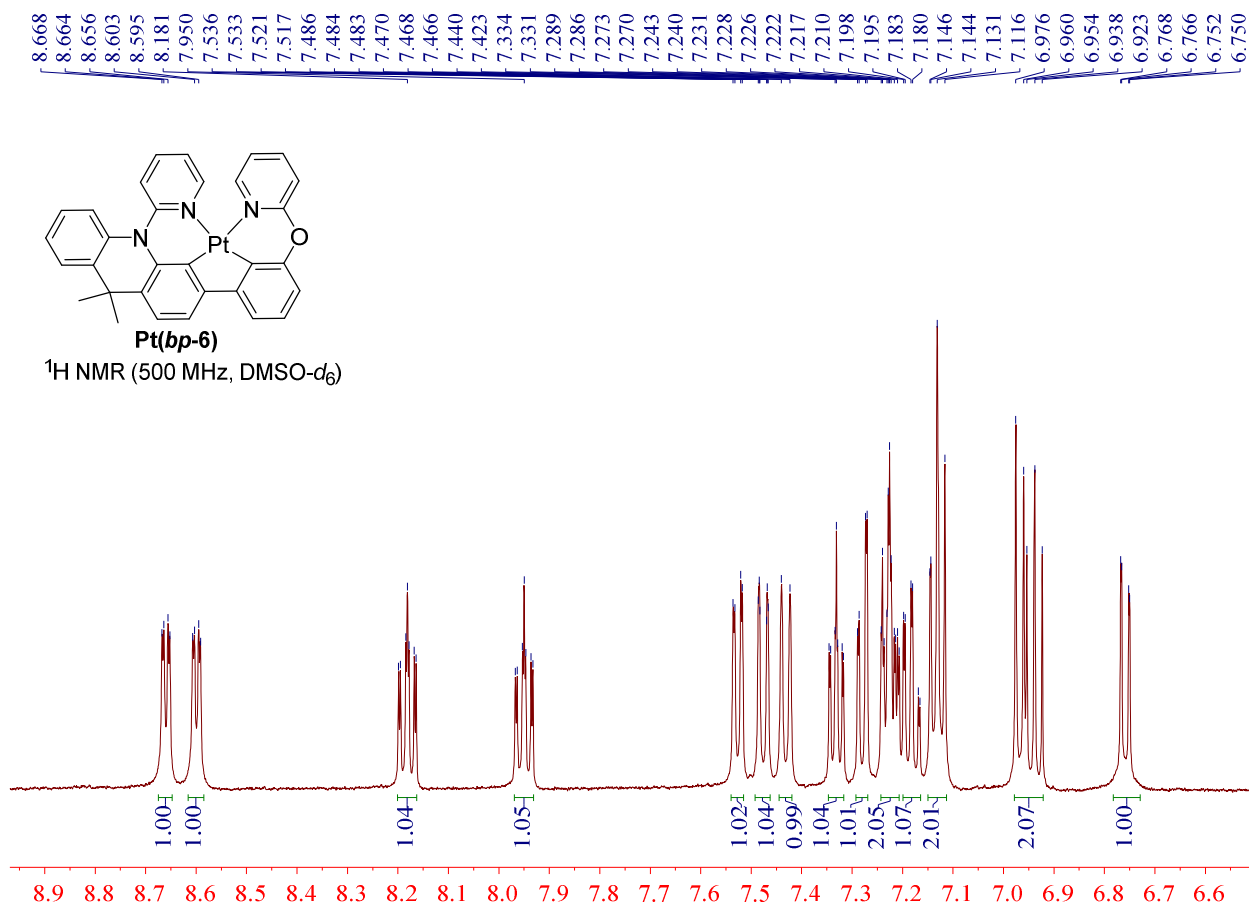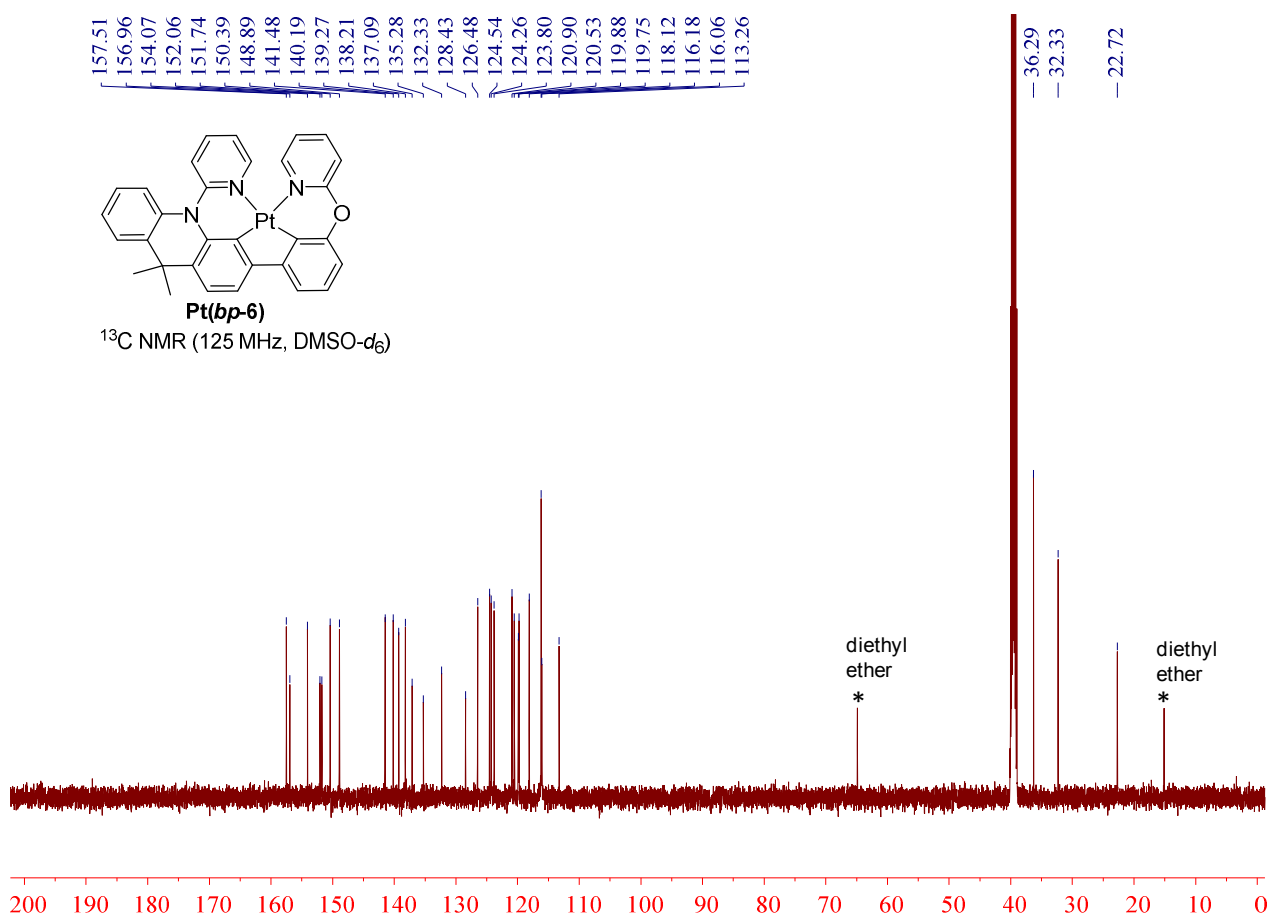

$\sim 157.51$   
 $\sim 156.96$   
 $\sim 154.07$   
 $\sim 152.06$   
 $\sim 151.74$   
 $\sim 150.39$   
 $\sim 148.89$   
 $\sim 141.48$   
 $\sim 140.19$   
 $\sim 139.27$   
 $\sim 138.21$   
 $\sim 137.09$   
 $\sim 135.28$   
 $\sim 132.33$   
 $\sim 128.43$   
 $\sim 126.48$   
 $\sim 124.54$   
 $\sim 124.26$   
 $\sim 123.80$   
 $\sim 120.90$   
 $\sim 120.53$   
 $\sim 119.88$   
 $\sim 119.75$   
 $\sim 118.12$   
 $\sim 116.18$   
 $\sim 116.06$   
 $\sim 113.26$

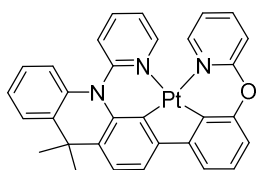

**Pt(bp-6)**

$^{13}\text{C}$  NMR (125 MHz, DMSO- $d_6$ )

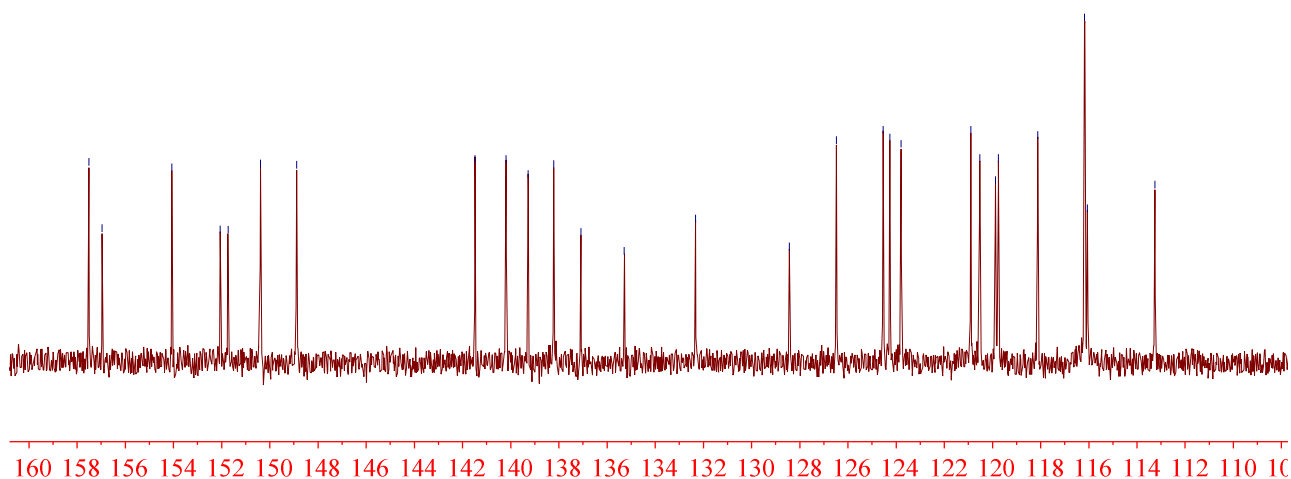

+ Scan (0.2-0.3 min, 8 scans) SG-2-24.d Subtract

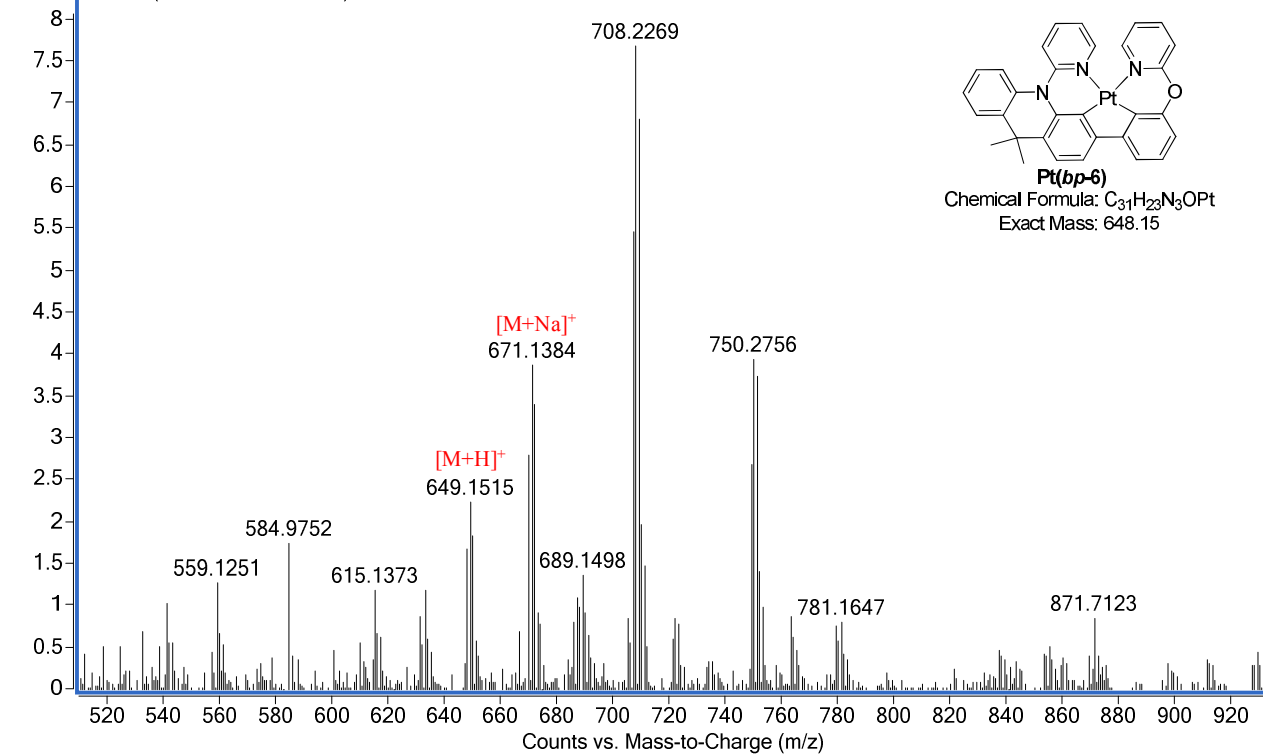

| Fomula(M)                                                        | Ion Formula                                                        | m/z      | Calc m/z | Error (ppm) |
|------------------------------------------------------------------|--------------------------------------------------------------------|----------|----------|-------------|
| $\text{C}_{31}\text{H}_{23}\text{N}_3\text{O} [^{195}\text{Pt}]$ | $\text{C}_{31}\text{H}_{23}\text{N}_3\text{NaO} [^{195}\text{Pt}]$ | 671.1384 | 671.1381 | -0.45       |

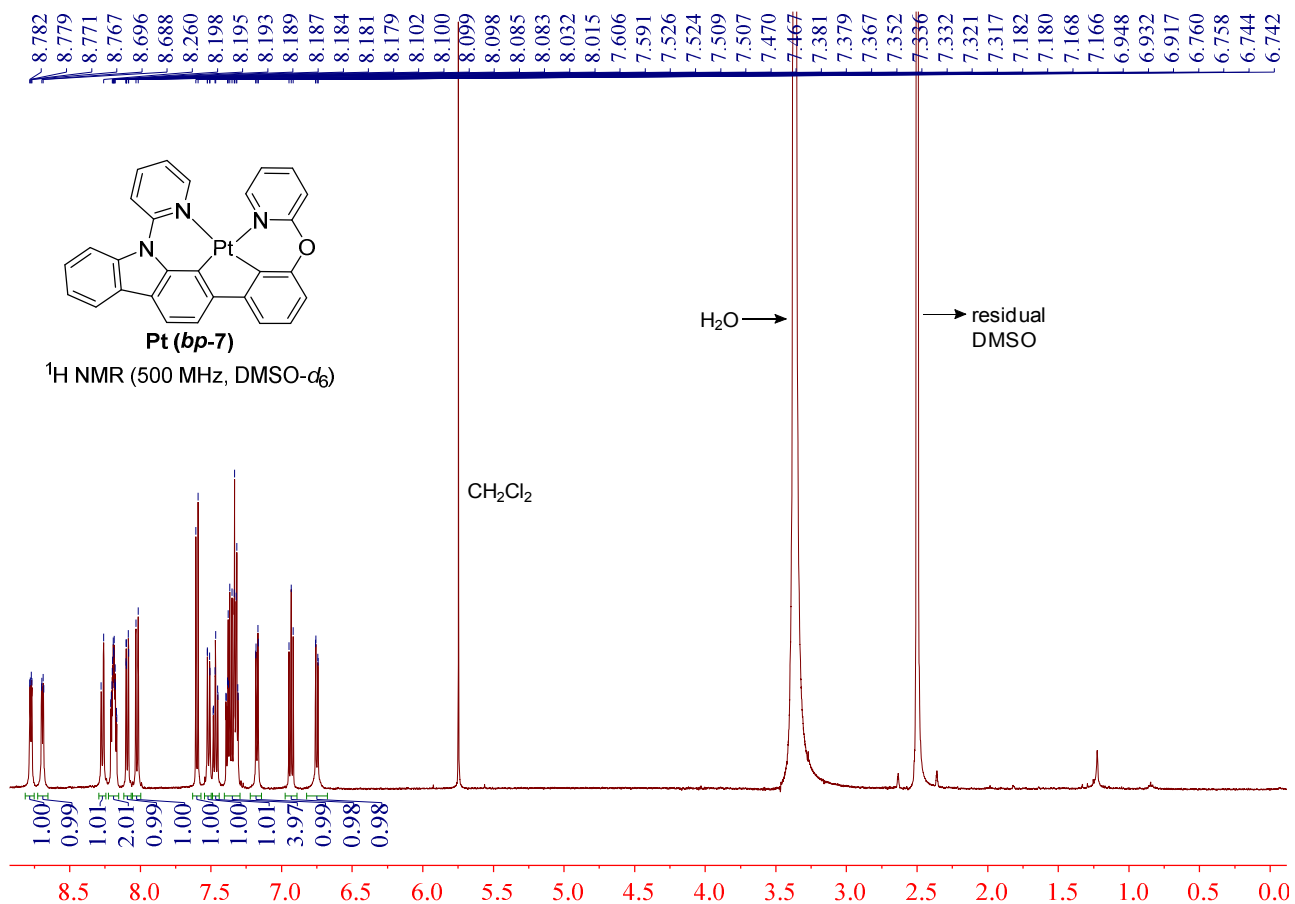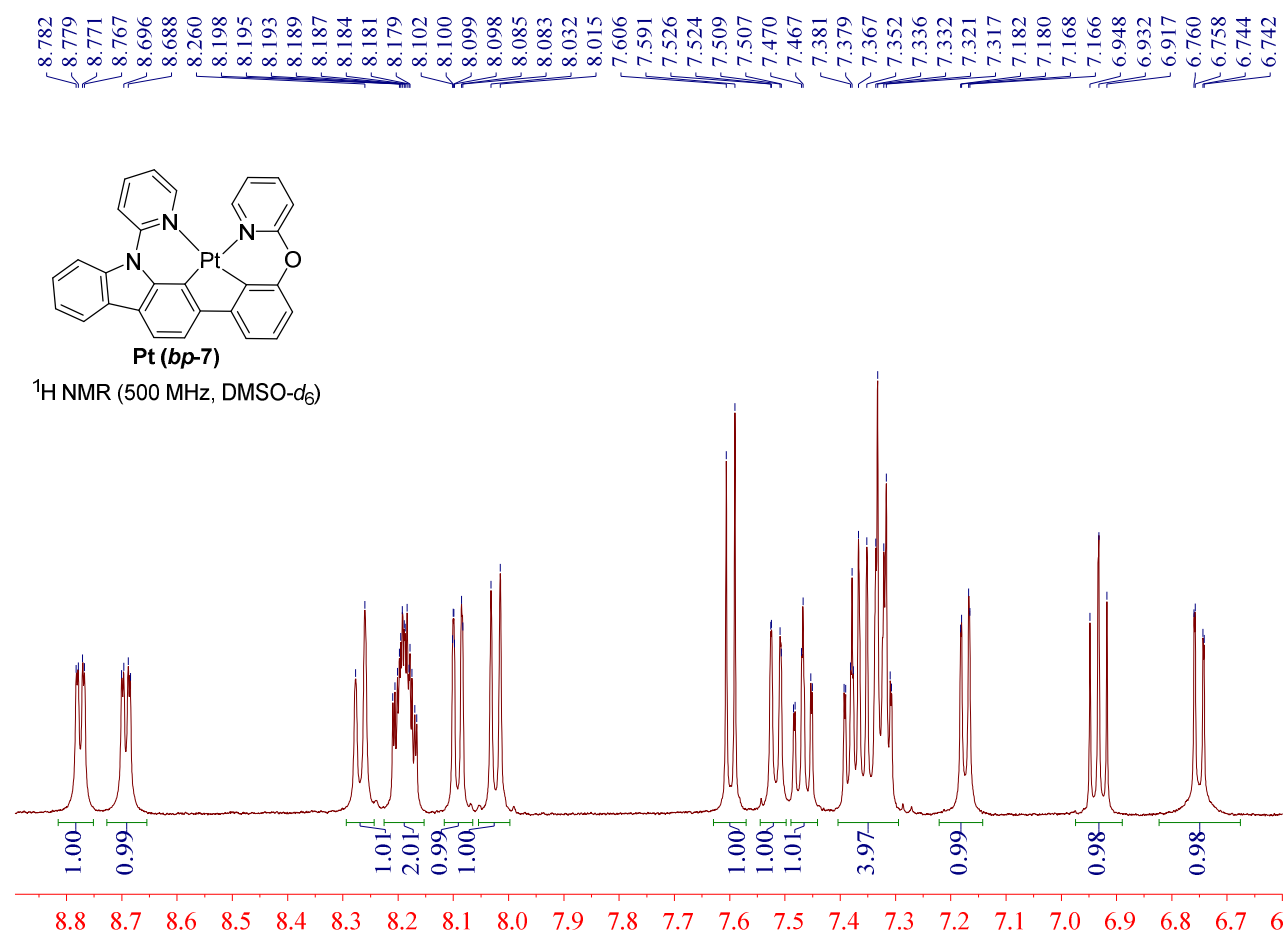

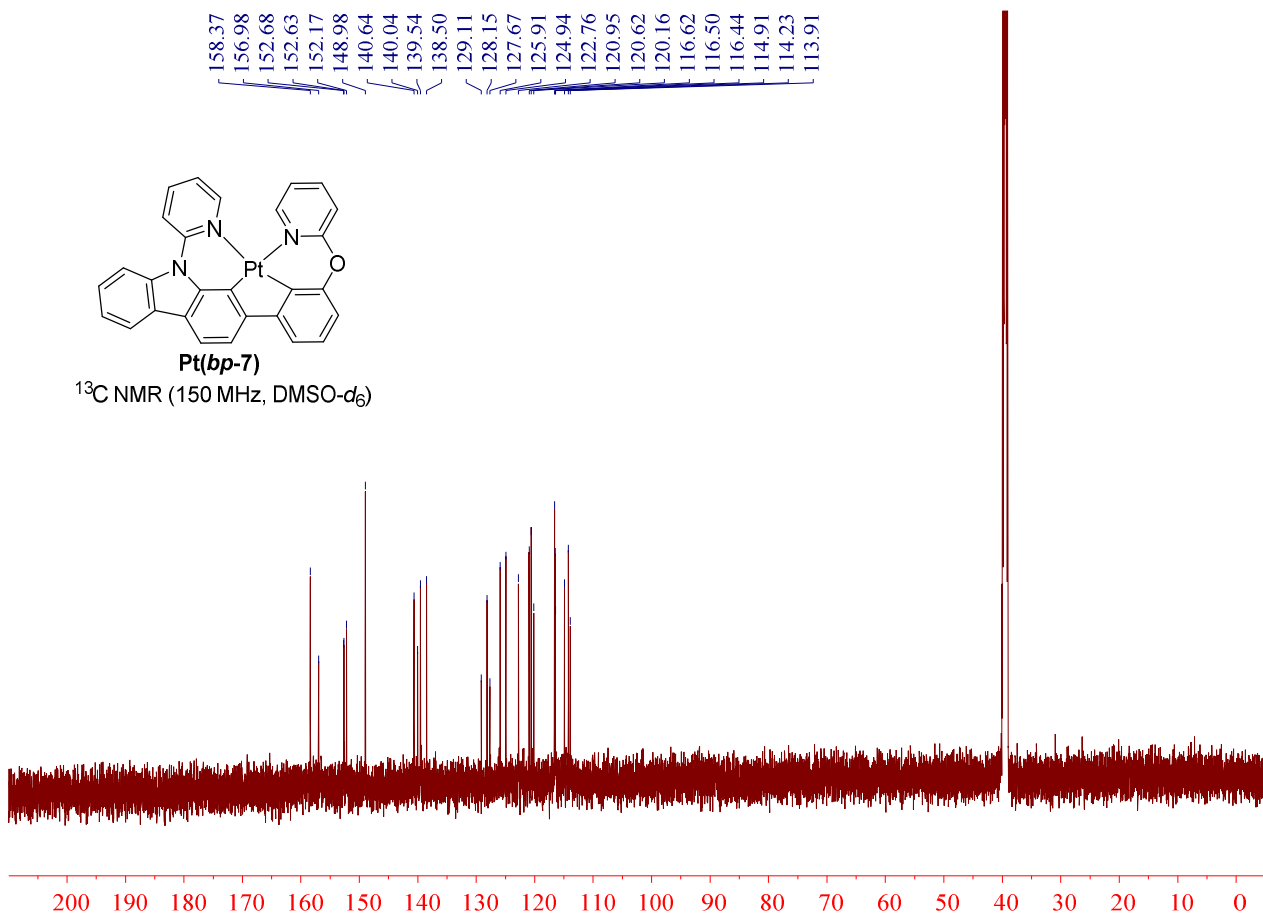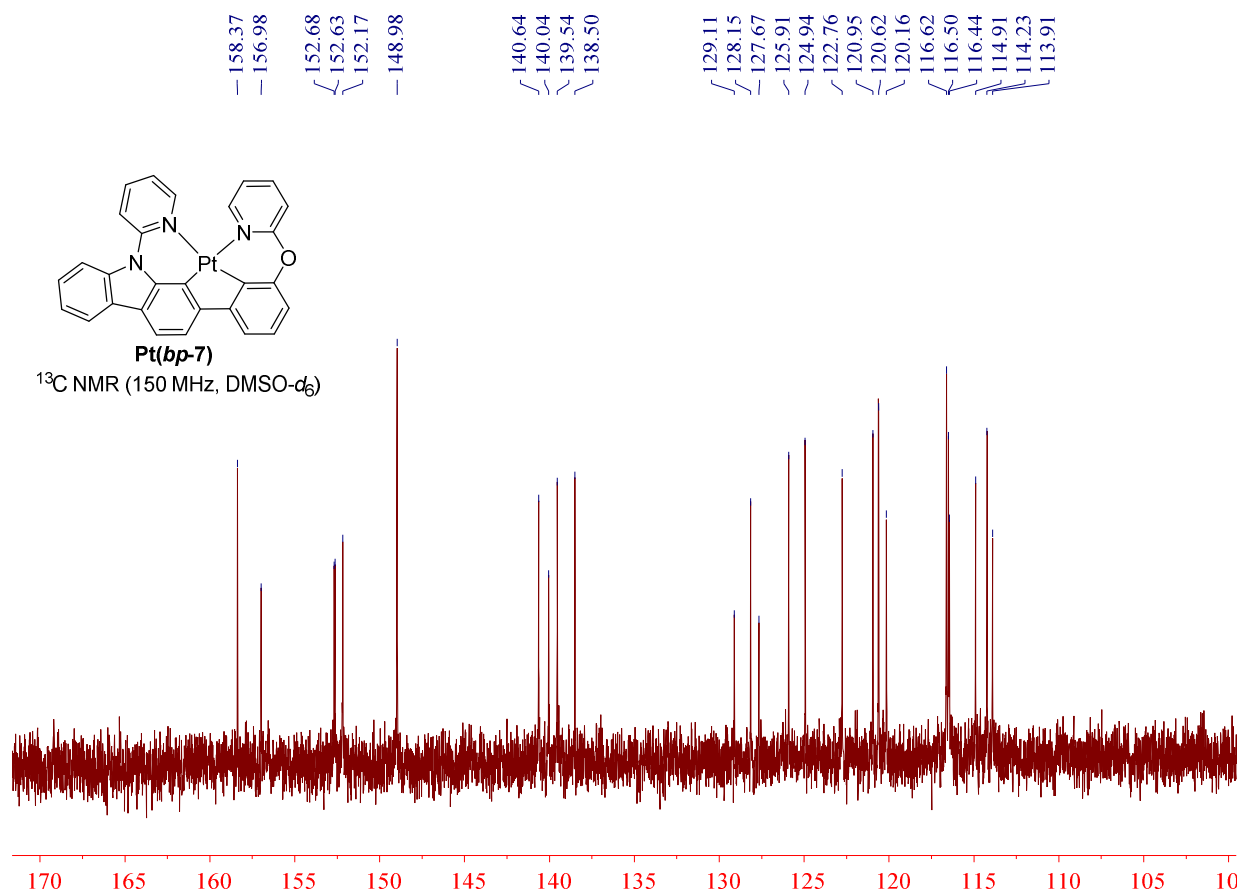



Card Serial Number : D172118

Sample Serial Number: Z-9-2

Operator : DONG Date: 2017/12/20

Operation Mode: DART POSITIVE Ion Mode

Elemental composition search on mass 607.11

m/z= 602.11-612.11

| m/z      | Theo.<br>Mass | Delta<br>(ppm) | RDB<br>equiv. | Composition                                                        |
|----------|---------------|----------------|---------------|--------------------------------------------------------------------|
| 607.1092 | 607.1092      | -0.00          | 21.5          | C <sub>28</sub> H <sub>18</sub> O N <sub>3</sub> Pt                |
|          | 607.1097      | -0.88          | 33.0          | C <sub>38</sub> H <sub>17</sub> O <sub>2</sub> N <sub>5</sub> S    |
|          | 607.1086      | 1.07           | 12.5          | C <sub>20</sub> H <sub>22</sub> O <sub>3</sub> N <sub>5</sub> Pt S |
|          | 607.1099      | -1.14          | 12.0          | C <sub>22</sub> H <sub>24</sub> O <sub>4</sub> N <sub>2</sub> Pt S |
|          | 607.1106      | -2.22          | 21.0          | C <sub>30</sub> H <sub>20</sub> O <sub>2</sub> Pt                  |
|          | 607.1077      | 2.46           | 37.5          | C <sub>43</sub> H <sub>15</sub> O <sub>3</sub> N <sub>2</sub>      |
|          | 607.1111      | -3.10          | 32.5          | C <sub>40</sub> H <sub>19</sub> O <sub>3</sub> N <sub>2</sub> S    |
|          | 607.1071      | 3.53           | 28.5          | C <sub>35</sub> H <sub>19</sub> O <sub>5</sub> N <sub>4</sub> S    |
|          | 607.1065      | 4.41           | 17.0          | C <sub>25</sub> H <sub>20</sub> O <sub>4</sub> N <sub>2</sub> Pt   |
|          | 607.1064      | 4.67           | 38.0          | C <sub>41</sub> H <sub>13</sub> O <sub>2</sub> N <sub>5</sub>      |

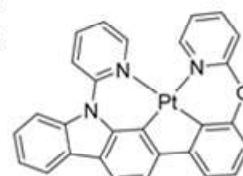

Pt(bp-7)

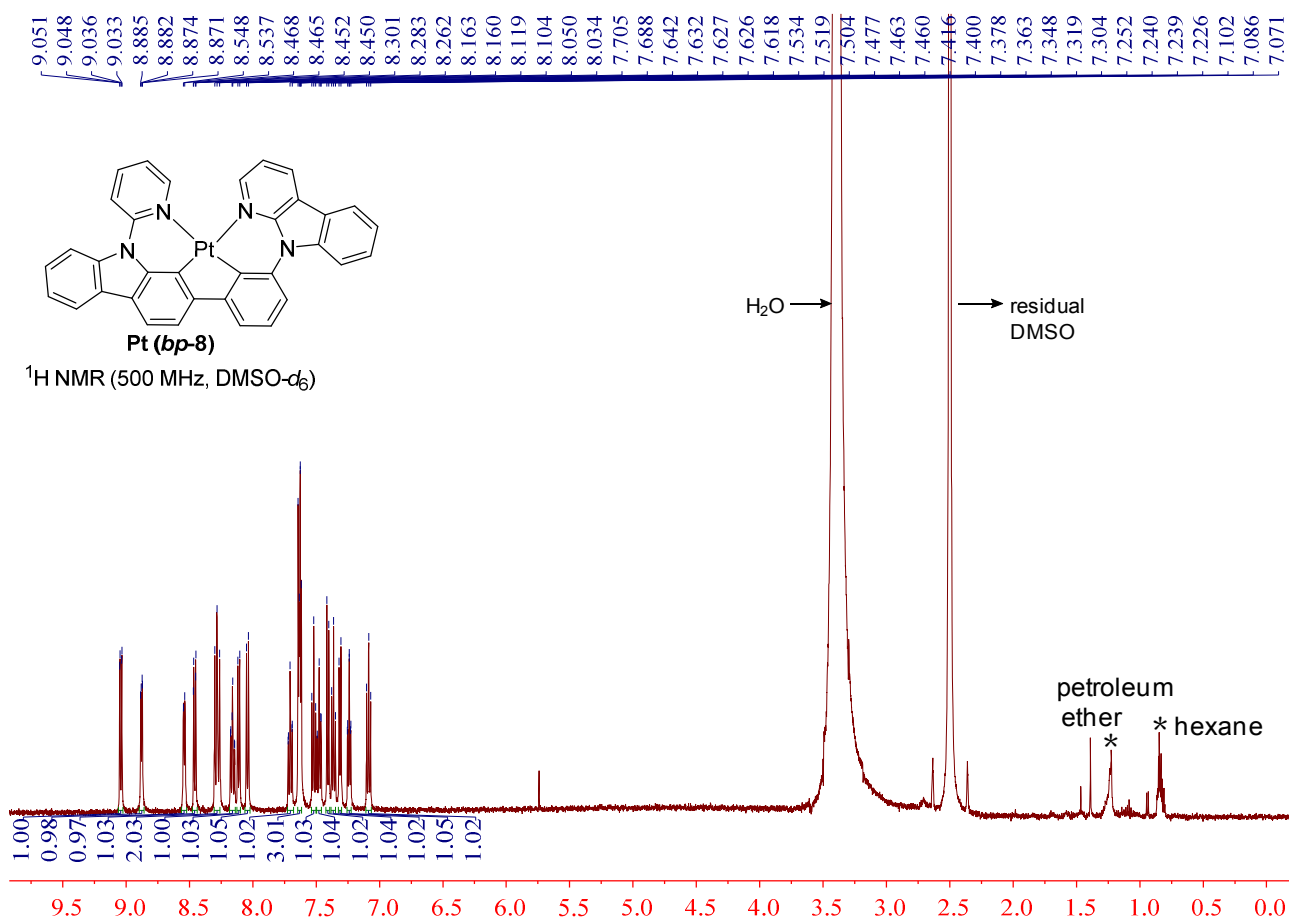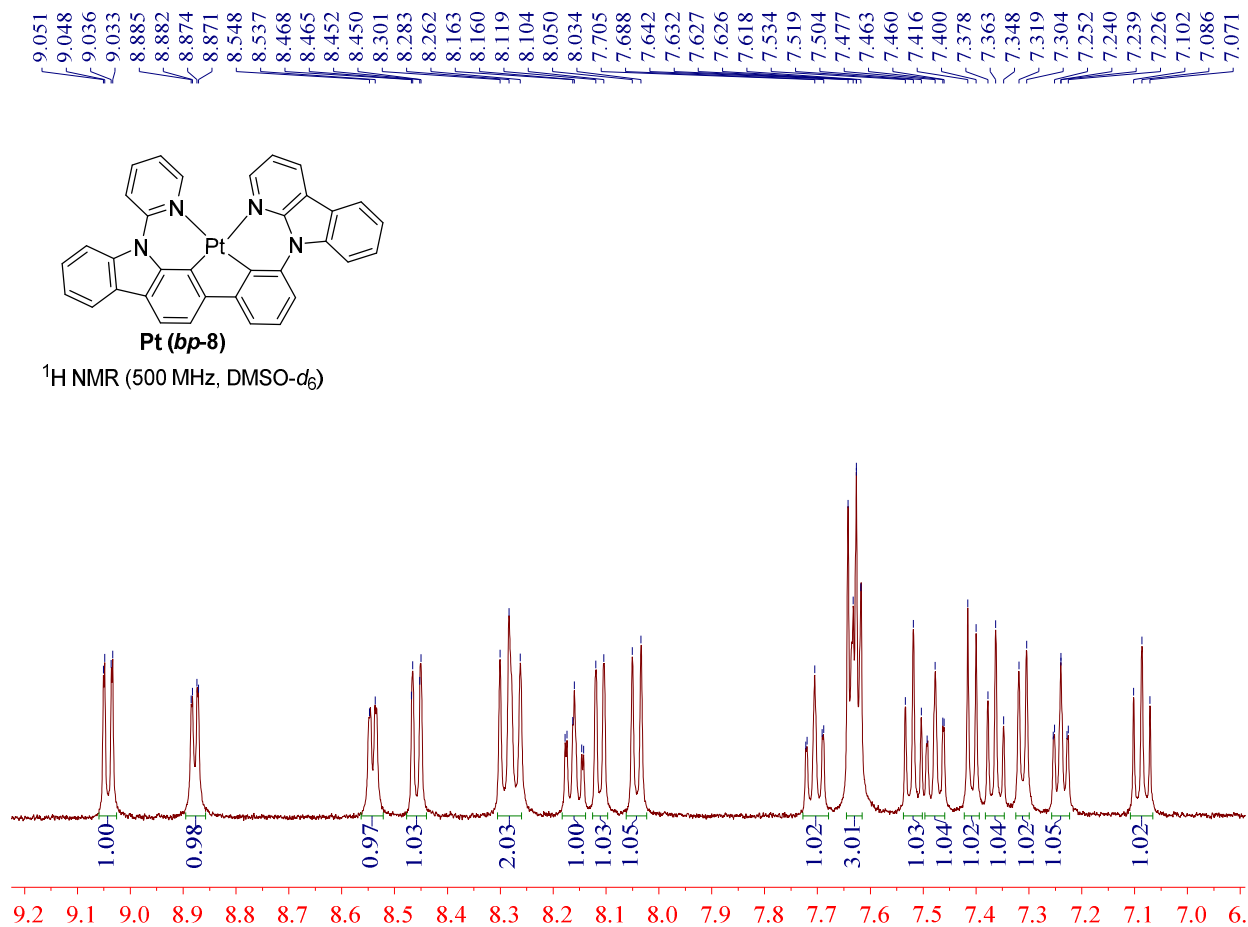

157.00  
153.61  
152.44  
149.00  
146.44  
146.39  
139.68  
139.36  
138.30  
138.26  
136.10  
135.63  
130.50  
129.50  
128.11  
127.85  
125.88  
124.43  
122.71  
122.36  
122.16  
121.97  
120.88  
120.65  
119.84  
119.64  
118.38  
116.73  
116.66  
116.42  
115.60  
114.89  
113.97

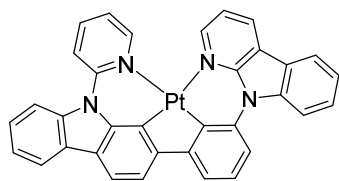

**Pt(bp-8)**

$^{13}\text{C}$  NMR (150 MHz,  $\text{DMSO}-d_6$ )

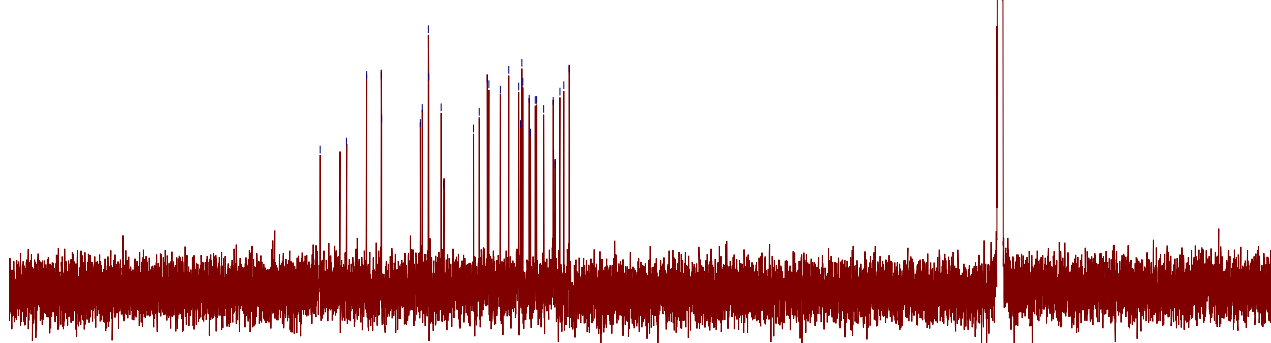

10 200 190 180 170 160 150 140 130 120 110 100 90 80 70 60 50 40 30 20 10 0  
157.00  
153.61  
152.44  
149.00  
146.44  
146.39  
139.68  
139.36  
138.30  
138.26  
136.10  
135.63  
130.50  
129.50  
128.11  
127.85  
125.88  
124.43  
122.71  
122.36  
122.16  
121.97  
120.88  
120.65  
119.84  
119.64  
118.38  
116.73  
116.66  
116.42  
115.60  
114.89  
113.97

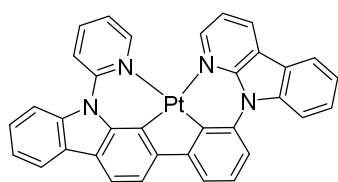

**Pt(bp-8)**

$^{13}\text{C}$  NMR (150 MHz,  $\text{DMSO}-d_6$ )

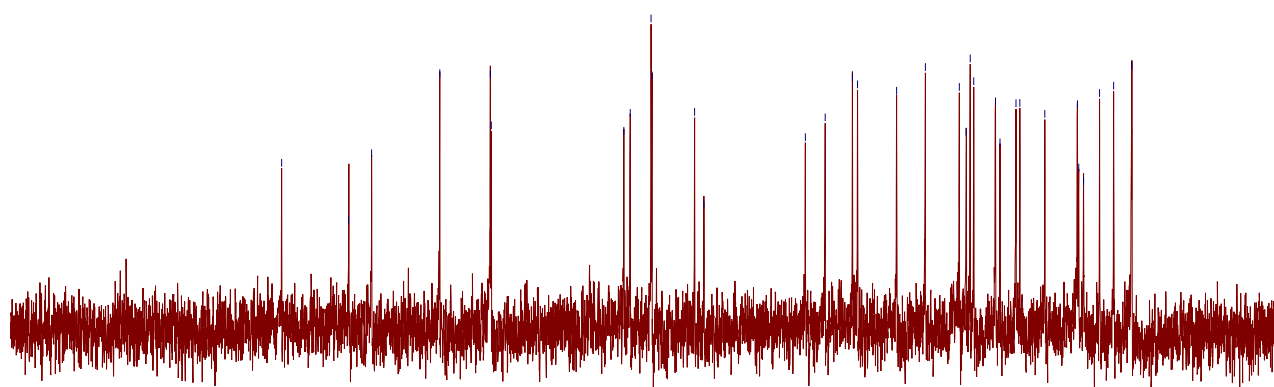

168 164 160 156 152 148 144 140 136 132 128 124 120 116 112 108

Card Serial Number : D172122

Sample Serial Number: Z-10-72

Operator : DONG

Date: 2017/12/20

Operation Mode: DART POSITIVE Ion Mode

Elemental composition search on mass 680.14

m/z= 675.14-685.14

| m/z      | Theo.<br>Mass | Delta<br>(ppm) | RDB<br>equiv. | Composition                                                        |
|----------|---------------|----------------|---------------|--------------------------------------------------------------------|
| 680.1411 | 680.1408      | 0.43           | 26.5          | C <sub>34</sub> H <sub>21</sub> N <sub>4</sub> Pt                  |
|          | 680.1415      | -0.59          | 17.0          | C <sub>28</sub> H <sub>27</sub> O <sub>3</sub> N <sub>3</sub> Pt S |
|          | 680.1422      | -1.54          | 26.0          | C <sub>36</sub> H <sub>23</sub> O N Pt                             |
|          | 680.1400      | 1.61           | 33.0          | C <sub>43</sub> H <sub>24</sub> O <sub>5</sub> N <sub>2</sub> S    |
|          | 680.1395      | 2.40           | 21.5          | C <sub>33</sub> H <sub>25</sub> O <sub>4</sub> Pt                  |
|          | 680.1429      | -2.56          | 16.5          | C <sub>30</sub> H <sub>29</sub> O <sub>4</sub> Pt S                |
|          | 680.1387      | 3.59           | 33.5          | C <sub>41</sub> H <sub>22</sub> O <sub>4</sub> N <sub>5</sub> S    |
|          | 680.1382      | 4.37           | 22.0          | C <sub>31</sub> H <sub>23</sub> O <sub>3</sub> N <sub>3</sub> Pt   |
|          | 680.1442      | -4.53          | 21.5          | C <sub>31</sub> H <sub>25</sub> N <sub>4</sub> Pt S                |

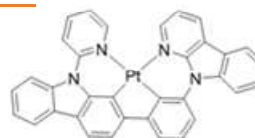

Pt(bp-8)

## Cartesian Coordinates of the Structures

### Pt(*ppy*-1)<sub>3</sub>S<sub>0</sub>

|   |             |             |             |
|---|-------------|-------------|-------------|
| C | -3.53863900 | 1.78471700  | -0.71644000 |
| C | -4.01847400 | 0.74328600  | 0.30010000  |
| C | -4.78225700 | -1.22522200 | 2.16696900  |
| C | -5.23098100 | 0.83379800  | 0.99444000  |
| C | -3.18901600 | -0.36432600 | 0.55728400  |
| C | -3.56171200 | -1.32713700 | 1.50590600  |
| C | -5.62358700 | -0.14280100 | 1.90925800  |
| H | -5.88463600 | 1.68090500  | 0.82004600  |
| H | -2.88881600 | -2.14699600 | 1.73366200  |
| H | -6.57408400 | -0.04936200 | 2.42657500  |
| H | -5.06023700 | -1.97875900 | 2.89836900  |
| C | -2.03968900 | 1.97843500  | -0.46019400 |
| C | 0.75872900  | 2.20223200  | -0.13528800 |
| C | -1.24721100 | 0.83073800  | -0.24559100 |
| C | -1.40222000 | 3.22703900  | -0.46763200 |
| C | -0.02236100 | 3.34925000  | -0.29160100 |
| C | 0.13335900  | 0.92355300  | -0.13344100 |
| H | -1.98725700 | 4.12748000  | -0.61332300 |
| H | 0.42813300  | 4.33857100  | -0.28676600 |
| C | -4.32642000 | 3.10167700  | -0.61849900 |
| H | -5.38682100 | 2.93548300  | -0.83275100 |
| H | -3.96634700 | 3.81955600  | -1.36155400 |
| H | -4.24173900 | 3.55901300  | 0.37300300  |
| C | -3.72979900 | 1.22040100  | -2.15516500 |
| H | -4.79296300 | 1.03765000  | -2.34969100 |
| H | -3.18865900 | 0.28093100  | -2.29771700 |
| H | -3.35928200 | 1.93922900  | -2.89451600 |
| N | -1.91320300 | -0.43226100 | -0.09210500 |

|    |             |             |             |
|----|-------------|-------------|-------------|
| C  | 2.22139800  | 2.16962800  | 0.05931900  |
| C  | 4.94144000  | 1.59160000  | 0.40321600  |
| C  | 3.14791100  | 3.21372700  | 0.12335500  |
| C  | 4.50381400  | 2.91528600  | 0.30004200  |
| C  | 3.98994500  | 0.57744500  | 0.33597900  |
| H  | 2.81778400  | 4.24307100  | 0.03201800  |
| C  | -1.38762200 | -1.68833500 | -0.42074700 |
| C  | -0.43889400 | -4.24192700 | -1.01961300 |
| C  | -2.27029300 | -2.69321300 | -0.87786400 |
| N  | -0.06009800 | -1.96888900 | -0.31729400 |
| C  | 0.39082800  | -3.21832400 | -0.61062800 |
| C  | -1.80292800 | -3.96043900 | -1.17060100 |
| H  | -3.31731800 | -2.44793300 | -1.00250500 |
| H  | 1.46195100  | -3.34894300 | -0.49578200 |
| H  | -2.49085500 | -4.71979100 | -1.53093000 |
| H  | -0.02629500 | -5.22172100 | -1.23113600 |
| Pt | 1.38622900  | -0.56336600 | 0.03448100  |
| H  | 5.22357800  | 3.72773500  | 0.34930100  |
| H  | 5.98385400  | 1.32170100  | 0.52599200  |
| N  | 2.69927900  | 0.90131600  | 0.18636000  |
| C  | 4.28187700  | -0.93389500 | 0.38648400  |
| O  | 3.23915800  | -1.70239400 | 0.25697000  |
| O  | 5.44822700  | -1.28005800 | 0.52992300  |

**Pt(*ppy*-1)\_T<sub>1</sub>**

|   |            |             |             |
|---|------------|-------------|-------------|
| C | 3.53422300 | -1.77954600 | -0.73707700 |
| C | 4.02734700 | -0.74329500 | 0.27820000  |
| C | 4.79885100 | 1.21325100  | 2.15836200  |
| C | 5.24616700 | -0.83424300 | 0.96189100  |
| C | 3.19928400 | 0.36127100  | 0.55214900  |
| C | 3.57426800 | 1.31833500  | 1.50608800  |

|   |             |             |             |
|---|-------------|-------------|-------------|
| C | 5.64113600  | 0.13535600  | 1.88283400  |
| H | 5.90231900  | -1.67634300 | 0.77319700  |
| H | 2.89911300  | 2.13240700  | 1.74682300  |
| H | 6.59649600  | 0.04123000  | 2.39107000  |
| H | 5.07964700  | 1.95962500  | 2.89573200  |
| C | 2.04298700  | -1.96074400 | -0.44886700 |
| C | -0.81237100 | -2.23419600 | -0.10132900 |
| C | 1.25291700  | -0.82088300 | -0.23966800 |
| C | 1.37550300  | -3.22001000 | -0.43460500 |
| C | 0.00852300  | -3.37083200 | -0.25746600 |
| C | -0.14346300 | -0.90969600 | -0.11960300 |
| H | 1.96743700  | -4.11884800 | -0.57194800 |
| H | -0.41909100 | -4.36929900 | -0.24499700 |
| C | 4.31478200  | -3.10167000 | -0.64194300 |
| H | 5.37432400  | -2.94475600 | -0.86748200 |
| H | 3.94260400  | -3.81981100 | -1.37910800 |
| H | 4.23709100  | -3.55525500 | 0.35207700  |
| C | 3.72475900  | -1.21686000 | -2.17634700 |
| H | 4.78762000  | -1.03873500 | -2.37987400 |
| H | 3.18775100  | -0.27424500 | -2.31676200 |
| H | 3.34499300  | -1.93296800 | -2.91386200 |
| N | 1.90880500  | 0.43175700  | -0.07283000 |
| C | -2.22174500 | -2.18869000 | 0.08026200  |
| C | -4.95859000 | -1.54347500 | 0.38989900  |
| C | -3.19501100 | -3.21912800 | 0.14235000  |
| C | -4.53046000 | -2.90385800 | 0.29974900  |
| C | -4.00351900 | -0.54955000 | 0.32835800  |
| H | -2.88148100 | -4.25548500 | 0.05938800  |
| C | 1.38856500  | 1.69543200  | -0.40183200 |
| C | 0.44068400  | 4.24183700  | -0.99892800 |

|    |             |             |             |
|----|-------------|-------------|-------------|
| C  | 2.27388600  | 2.69685500  | -0.85287400 |
| N  | 0.05763100  | 1.96512600  | -0.30933100 |
| C  | -0.39195700 | 3.21946700  | -0.59831900 |
| C  | 1.80779500  | 3.96537800  | -1.14859000 |
| H  | 3.32156800  | 2.45182100  | -0.97123900 |
| H  | -1.46361600 | 3.34982100  | -0.48953700 |
| H  | 2.49503500  | 4.72586700  | -1.50635600 |
| H  | 0.02757400  | 5.22204900  | -1.20848600 |
| Pt | -1.38850800 | 0.54571500  | 0.03015600  |
| H  | -5.26782900 | -3.69940400 | 0.34646500  |
| H  | -6.00089500 | -1.26799200 | 0.49870900  |
| N  | -2.70337600 | -0.88151200 | 0.20375700  |
| C  | -4.25665500 | 0.95636300  | 0.36818300  |
| O  | -3.16786600 | 1.69881900  | 0.25385000  |
| O  | -5.39412100 | 1.38315000  | 0.48834400  |

**Pt(*bp-6*)\_S<sub>0</sub>**

|   |             |             |             |
|---|-------------|-------------|-------------|
| C | -4.23357600 | 1.29923200  | -0.33079600 |
| C | -4.37509700 | 0.12043000  | 0.63702300  |
| C | -4.52245600 | -2.13246800 | 2.32851300  |
| C | -5.49056000 | -0.10147600 | 1.45334100  |
| C | -3.32128100 | -0.80980100 | 0.69276100  |
| C | -3.39081100 | -1.91977100 | 1.54626300  |
| C | -5.57596900 | -1.21861200 | 2.28525700  |
| H | -6.31372400 | 0.60419200  | 1.43943300  |
| H | -2.54938600 | -2.60344300 | 1.60307000  |
| H | -6.45803900 | -1.36741200 | 2.90177200  |
| H | -4.56749400 | -2.99559800 | 2.98695300  |
| C | -2.77841400 | 1.77909400  | -0.24211500 |
| C | -0.06460700 | 2.55923000  | -0.17638900 |
| C | -1.74380600 | 0.81484700  | -0.20127300 |



|   |             |             |             |
|---|-------------|-------------|-------------|
| C | -2.41435200 | 3.12821500  | -0.23649400 |
| C | -1.07431400 | 3.52011000  | -0.18903300 |
| C | -0.40016700 | 1.18059100  | -0.21749600 |
| H | -3.18055400 | 3.89510300  | -0.25803200 |
| H | -0.83356400 | 4.57951100  | -0.14682600 |
| C | -5.24107400 | 2.42009800  | -0.02402200 |
| H | -6.26870600 | 2.05436200  | -0.11820000 |
| H | -5.13360300 | 3.23929500  | -0.74099200 |
| H | -5.10827600 | 2.82557700  | 0.98459700  |
| C | -4.51134400 | 0.79733900  | -1.77872600 |
| H | -5.53622900 | 0.41556700  | -1.86125700 |
| H | -3.82323800 | -0.00125500 | -2.06996300 |
| H | -4.38807300 | 1.62165400  | -2.49012600 |
| N | -2.14655900 | -0.56589200 | -0.07552900 |
| C | 1.38401700  | 2.81308600  | -0.04773600 |
| C | 4.17269100  | 2.99665200  | 0.15234600  |
| C | 2.15339300  | 1.62202700  | 0.07025500  |
| C | 2.00773600  | 4.06223400  | -0.04644100 |
| C | 3.40133000  | 4.15080200  | 0.05765000  |
| C | 3.52926500  | 1.75218100  | 0.15308200  |
| H | 1.42031300  | 4.97204300  | -0.14007200 |
| C | -1.52035100 | -1.63123900 | -0.71787500 |
| C | -0.33290000 | -3.68823200 | -2.15532700 |
| C | -2.31521700 | -2.65484100 | -1.28810100 |
| N | -0.16890300 | -1.67441000 | -0.82770400 |
| C | 0.38631000  | -2.66391600 | -1.57042600 |
| C | -1.72516800 | -3.68434500 | -1.99469700 |
| H | -3.39156900 | -2.59780700 | -1.18513200 |
| H | 1.46300500  | -2.60689300 | -1.68080200 |
| H | -2.34102200 | -4.45650800 | -2.44707200 |

|    |            |             |             |
|----|------------|-------------|-------------|
| H  | 0.17759400 | -4.45568300 | -2.72668800 |
| C  | 4.17267300 | -0.62176400 | 0.45440700  |
| C  | 3.92938700 | -3.29932900 | 1.05436100  |
| N  | 2.96228300 | -1.20102900 | 0.33222000  |
| C  | 5.31672200 | -1.35994800 | 0.83151000  |
| C  | 5.19724000 | -2.70190200 | 1.12717600  |
| C  | 2.86244700 | -2.51614000 | 0.66209000  |
| H  | 6.06876500 | -3.27686800 | 1.42644000  |
| H  | 1.86242900 | -2.92831700 | 0.60263400  |
| H  | 3.77385300 | -4.34372200 | 1.30139300  |
| Pt | 1.14002200 | -0.06729800 | -0.12867000 |
| H  | 3.88651300 | 5.12304700  | 0.05768300  |
| H  | 5.25534700 | 3.03941800  | 0.22307000  |
| O  | 4.42305900 | 0.67002900  | 0.21813500  |
| H  | 6.26127400 | -0.83220700 | 0.89183100  |

**Pt(*bp-6*)\_T<sub>1</sub>**

|   |             |             |             |
|---|-------------|-------------|-------------|
| C | -4.22338300 | 1.25765600  | -0.40716300 |
| C | -4.37411700 | 0.11277500  | 0.60121000  |
| C | -4.52484100 | -2.07412200 | 2.37592800  |
| C | -5.49170100 | -0.07617300 | 1.42399800  |
| C | -3.31975900 | -0.81386900 | 0.69613300  |
| C | -3.39138100 | -1.89225900 | 1.58865600  |
| C | -5.57776000 | -1.16088400 | 2.29691500  |
| H | -6.31536300 | 0.62781800  | 1.38036000  |
| H | -2.55042200 | -2.57369700 | 1.67010300  |
| H | -6.46154300 | -1.28745900 | 2.91603700  |
| H | -4.57232300 | -2.91190300 | 3.06607300  |
| C | -2.77671400 | 1.74197700  | -0.28908200 |
| C | -0.05294100 | 2.58177100  | -0.17257700 |

|   |             |             |             |
|---|-------------|-------------|-------------|
| C | -1.74361800 | 0.78425700  | -0.21701500 |
| C | -2.41242100 | 3.12974900  | -0.28583100 |
| C | -1.11055200 | 3.54747900  | -0.23293800 |
| C | -0.39940500 | 1.15237900  | -0.21592900 |
| H | -3.19880400 | 3.87564700  | -0.32274200 |
| H | -0.88323200 | 4.60936100  | -0.21176800 |
| C | -5.24489200 | 2.38116700  | -0.15884100 |
| H | -6.26689700 | 2.00235200  | -0.26100100 |
| H | -5.12991300 | 3.17646500  | -0.90147600 |
| H | -5.13836200 | 2.82185300  | 0.83821800  |
| C | -4.46943800 | 0.70731100  | -1.84448700 |
| H | -5.49247200 | 0.32170300  | -1.93561900 |
| H | -3.77496500 | -0.09989000 | -2.09239900 |
| H | -4.33234100 | 1.50719900  | -2.58118900 |
| N | -2.13916000 | -0.58962100 | -0.06928900 |
| C | 1.31530800  | 2.83327800  | -0.00686100 |
| C | 4.12957700  | 3.01215200  | 0.18212300  |
| C | 2.13266000  | 1.61281500  | 0.06861800  |
| C | 1.95840900  | 4.11701300  | 0.06454700  |
| C | 3.32468100  | 4.18880800  | 0.15135300  |
| C | 3.51020100  | 1.75983600  | 0.13633300  |
| H | 1.36431600  | 5.02544000  | 0.03186000  |
| C | -1.50061400 | -1.66941900 | -0.68049300 |
| C | -0.28309900 | -3.75388600 | -2.04451600 |
| C | -2.27904700 | -2.72111600 | -1.20837800 |
| N | -0.14387400 | -1.68440700 | -0.79543800 |
| C | 0.42224100  | -2.69658600 | -1.51105500 |
| C | -1.67749200 | -3.77313700 | -1.87759700 |
| H | -3.35583300 | -2.67486300 | -1.10297100 |
| H | 1.49543600  | -2.62166000 | -1.64065500 |

|    |             |             |             |
|----|-------------|-------------|-------------|
| H  | -2.28179400 | -4.57140000 | -2.29771500 |
| H  | 0.23901200  | -4.53179300 | -2.59123400 |
| C  | 4.17612100  | -0.60582700 | 0.39977300  |
| C  | 3.95149000  | -3.27076100 | 1.03811100  |
| N  | 2.95508500  | -1.17816500 | 0.33264400  |
| C  | 5.33138400  | -1.33776400 | 0.73032100  |
| C  | 5.22599900  | -2.68081600 | 1.04483500  |
| C  | 2.86816200  | -2.49254800 | 0.68875200  |
| H  | 6.10833200  | -3.25511300 | 1.31009600  |
| H  | 1.86563200  | -2.90223700 | 0.68400600  |
| H  | 3.80307600  | -4.31134400 | 1.30576900  |
| Pt | 1.13631400  | -0.05652500 | -0.12629300 |
| H  | 3.81793000  | 5.15625800  | 0.19557100  |
| H  | 5.21070100  | 3.07509600  | 0.24335300  |
| O  | 4.40962300  | 0.68981800  | 0.14004000  |
| H  | 6.27762100  | -0.80962800 | 0.74341500  |

**Pt(bp-7)\_S<sub>0</sub>**

|   |             |             |             |
|---|-------------|-------------|-------------|
| C | -4.25611300 | 1.06317900  | 0.36138000  |
| C | -6.19355600 | -0.83478800 | 1.00410700  |
| C | -5.55353900 | 1.48013400  | 0.67336100  |
| C | -3.94640400 | -0.32165900 | 0.33657700  |
| C | -4.90502400 | -1.27455300 | 0.69117600  |
| C | -6.52270000 | 0.52705400  | 0.98104200  |
| H | -5.79560100 | 2.53925600  | 0.69176800  |
| H | -4.66430600 | -2.32934100 | 0.75825100  |
| H | -7.53324300 | 0.84175800  | 1.22573900  |
| H | -6.94700900 | -1.56726000 | 1.28009800  |
| C | -3.02816000 | 1.78954900  | 0.10227000  |
| C | -0.34706300 | 2.53706300  | -0.21326700 |
| C | -2.00812700 | 0.82786300  | -0.05798800 |

|   |             |             |             |
|---|-------------|-------------|-------------|
| C | -2.69326900 | 3.14819700  | 0.05583400  |
| C | -1.35530000 | 3.51194000  | -0.10893600 |
| C | -0.67527100 | 1.15870300  | -0.20199500 |
| H | -3.45869000 | 3.91099600  | 0.17008500  |
| H | -1.09305300 | 4.56699300  | -0.11356000 |
| N | -2.57038700 | -0.47894000 | 0.02545200  |
| C | 1.11035100  | 2.77075700  | -0.25975500 |
| C | 3.90924500  | 2.88808800  | -0.40081800 |
| C | 1.86907200  | 1.56881300  | -0.15797300 |
| C | 1.75595300  | 3.99919800  | -0.41181200 |
| C | 3.15406900  | 4.05431400  | -0.48062300 |
| C | 3.24644800  | 1.66431100  | -0.23942800 |
| H | 1.17987900  | 4.91732300  | -0.49524800 |
| C | -1.97363300 | -1.63421700 | -0.47740400 |
| C | -0.81098000 | -3.92886200 | -1.52200400 |
| C | -2.77382900 | -2.62517100 | -1.08843800 |
| N | -0.61999000 | -1.77502900 | -0.42782900 |
| C | -0.08100500 | -2.89684300 | -0.96020000 |
| C | -2.19794900 | -3.77534100 | -1.59591100 |
| H | -3.83460200 | -2.45133400 | -1.19965700 |
| H | 1.00083600  | -2.94265100 | -0.93880200 |
| H | -2.81994800 | -4.52734900 | -2.07303800 |
| H | -0.30442400 | -4.80231400 | -1.91731900 |
| C | 3.88353800  | -0.65543700 | 0.31480900  |
| C | 3.67279300  | -3.14085000 | 1.48349500  |
| N | 2.65919400  | -1.20055300 | 0.45392900  |
| C | 5.05292600  | -1.34853100 | 0.69368200  |
| C | 4.94889300  | -2.59733500 | 1.27291700  |
| C | 2.57716200  | -2.41039000 | 1.06673300  |
| H | 5.84149200  | -3.13562600 | 1.57814300  |

|    |            |             |             |
|----|------------|-------------|-------------|
| H  | 1.56962900 | -2.77906400 | 1.21996700  |
| H  | 3.53301300 | -4.10305400 | 1.96366300  |
| Pt | 0.82492100 | -0.11187500 | -0.07004300 |
| H  | 3.65481800 | 5.01079100  | -0.60302000 |
| H  | 4.99318300 | 2.90644600  | -0.46105100 |
| O  | 4.11186800 | 0.55505600  | -0.21018000 |
| H  | 6.00640200 | -0.85925500 | 0.53292600  |

**Pt(bp-7)\_T<sub>1</sub>**

|   |             |             |             |
|---|-------------|-------------|-------------|
| C | 4.23435200  | 1.06387400  | -0.33636200 |
| C | 6.17583400  | -0.83330700 | -1.02496000 |
| C | 5.54731400  | 1.48443100  | -0.64751600 |
| C | 3.93223400  | -0.33932400 | -0.33085900 |
| C | 4.88941400  | -1.28088700 | -0.70927800 |
| C | 6.50322400  | 0.53647700  | -0.97578400 |
| H | 5.79376800  | 2.54249300  | -0.64514300 |
| H | 4.64934900  | -2.33442700 | -0.79427900 |
| H | 7.51384200  | 0.85223600  | -1.22046500 |
| H | 6.92821900  | -1.55668200 | -1.32504600 |
| C | 3.03249300  | 1.76437000  | -0.06742200 |
| C | 0.32877200  | 2.56524100  | 0.22611900  |
| C | 2.00422400  | 0.80079900  | 0.08842900  |
| C | 2.68561500  | 3.16338200  | -0.00039100 |
| C | 1.37925100  | 3.54267100  | 0.15822100  |
| C | 0.67700000  | 1.12843200  | 0.21391200  |
| H | 3.46824400  | 3.91215100  | -0.08639700 |
| H | 1.12917500  | 4.59954700  | 0.19033700  |
| N | 2.56683400  | -0.50081800 | -0.00109800 |
| C | -1.06477700 | 2.78873100  | 0.23276700  |
| C | -3.88370000 | 2.89746900  | 0.33619500  |

|    |             |             |             |
|----|-------------|-------------|-------------|
| C  | -1.85015400 | 1.56150900  | 0.15681400  |
| C  | -1.73710700 | 4.04464200  | 0.32341900  |
| C  | -3.11384800 | 4.08476400  | 0.37768000  |
| C  | -3.23151800 | 1.66790500  | 0.22887300  |
| H  | -1.16410600 | 4.96605100  | 0.37394300  |
| C  | 1.95560800  | -1.66531000 | 0.46374200  |
| C  | 0.76531400  | -3.97222400 | 1.44145800  |
| C  | 2.74512000  | -2.68746600 | 1.03088200  |
| N  | 0.58997700  | -1.77264200 | 0.42970400  |
| C  | 0.04472500  | -2.91261500 | 0.93403100  |
| C  | 2.16256000  | -3.84665300 | 1.50685200  |
| H  | 3.80917100  | -2.52850100 | 1.13589700  |
| H  | -1.03786500 | -2.93945700 | 0.93693600  |
| H  | 2.77621900  | -4.62042600 | 1.95801000  |
| H  | 0.24831200  | -4.84957100 | 1.81442400  |
| C  | -3.87599100 | -0.65100800 | -0.29223500 |
| C  | -3.67270600 | -3.12480600 | -1.47631100 |
| N  | -2.64918100 | -1.19055100 | -0.44353700 |
| C  | -5.04643100 | -1.33934500 | -0.66014100 |
| C  | -4.94867200 | -2.58820900 | -1.24750800 |
| C  | -2.57210200 | -2.39706900 | -1.07010100 |
| H  | -5.84330800 | -3.12624300 | -1.54605300 |
| H  | -1.56626900 | -2.76178200 | -1.24049300 |
| H  | -3.53581900 | -4.08307400 | -1.96538100 |
| Pt | -0.81781500 | -0.10471700 | 0.08873900  |
| H  | -3.62725200 | 5.03913600  | 0.45780300  |
| H  | -4.96724700 | 2.92866400  | 0.38347200  |
| O  | -4.09206100 | 0.56097800  | 0.24486000  |
| H  | -5.99805700 | -0.85078000 | -0.48670900 |

**Pt(bp-8)\_S<sub>0</sub>**

|   |             |             |             |
|---|-------------|-------------|-------------|
| C | -5.07770300 | 1.10717800  | 0.08530000  |
| C | -7.09462400 | -0.75960300 | 0.54530500  |
| C | -6.39121100 | 1.54479500  | 0.27949400  |
| C | -4.78824700 | -0.28207000 | 0.08460700  |
| C | -5.79034300 | -1.21978800 | 0.34938000  |
| C | -7.39928900 | 0.60728800  | 0.49539000  |
| H | -6.61679800 | 2.60772500  | 0.27846100  |
| H | -5.57472500 | -2.27840300 | 0.43583200  |
| H | -8.42288600 | 0.93776000  | 0.64756400  |
| H | -7.88135300 | -1.48040300 | 0.75002400  |
| C | -3.82087300 | 1.81414900  | -0.05959900 |
| C | -1.11450100 | 2.52320700  | -0.12505000 |
| C | -2.80448900 | 0.83816500  | -0.13765000 |
| C | -3.46572900 | 3.16822400  | -0.06404600 |
| C | -2.11414000 | 3.51277200  | -0.09943800 |
| C | -1.45812400 | 1.15100400  | -0.16958900 |
| H | -4.22825800 | 3.94074100  | -0.01352700 |
| H | -1.83923800 | 4.56395200  | -0.06705300 |
| N | -3.39271700 | -0.45812200 | -0.10332300 |
| C | 0.34138400  | 2.74441900  | -0.02591400 |
| C | 3.12100200  | 2.89425500  | 0.18200300  |
| C | 1.10230400  | 1.53988900  | 0.04408200  |
| C | 0.97130400  | 3.98874100  | 0.01518400  |
| C | 2.35899100  | 4.05712000  | 0.15324800  |
| C | 2.49798100  | 1.63566000  | 0.06170600  |
| H | 0.38913600  | 4.90498100  | -0.03666100 |
| N | 3.32233500  | 0.45380900  | 0.01337200  |
| C | 5.48297600  | 1.33278600  | -1.01835200 |
| C | 6.61192300  | -1.09281500 | -0.07387000 |



|    |             |             |             |
|----|-------------|-------------|-------------|
| C  | 4.69871600  | 0.41737400  | -0.30497900 |
| C  | 6.82720200  | 1.02838900  | -1.22322500 |
| C  | 7.39835200  | -0.16195500 | -0.74269000 |
| C  | 5.25683900  | -0.81071700 | 0.13313900  |
| H  | 7.44277400  | 1.72948100  | -1.77995100 |
| H  | 8.45123600  | -0.36394100 | -0.91583400 |
| C  | -2.76408600 | -1.63309800 | -0.51031400 |
| C  | -1.54162200 | -3.98102800 | -1.34117700 |
| C  | -3.51116800 | -2.62798700 | -1.17895000 |
| N  | -1.42701500 | -1.79130300 | -0.30869500 |
| C  | -0.85699400 | -2.94209700 | -0.73615800 |
| C  | -2.90681400 | -3.80501300 | -1.58071800 |
| H  | -4.54818200 | -2.43776100 | -1.41613100 |
| H  | 0.21330400  | -3.00768800 | -0.58878200 |
| H  | -3.48638000 | -4.56131900 | -2.10242700 |
| H  | -1.01254600 | -4.87748500 | -1.64494200 |
| C  | 2.99492100  | -0.79275600 | 0.52189100  |
| C  | 2.78485000  | -3.25879600 | 1.66639300  |
| N  | 1.75966100  | -1.25143900 | 0.77935600  |
| C  | 4.17145800  | -1.58013700 | 0.68774200  |
| C  | 4.05771300  | -2.83376800 | 1.27554000  |
| C  | 1.68121800  | -2.45583500 | 1.39031200  |
| H  | 4.93001100  | -3.46213100 | 1.43223300  |
| H  | 0.67860900  | -2.78047700 | 1.64515800  |
| H  | 2.63744000  | -4.21619000 | 2.15444100  |
| Pt | 0.01458000  | -0.12936800 | 0.09834400  |
| H  | 2.85345200  | 5.02057700  | 0.24321700  |
| H  | 5.06013300  | 2.23964100  | -1.43041200 |
| H  | 4.19045700  | 2.96695700  | 0.33166200  |

**Pt(bp-8)\_ T<sub>1</sub>**

|   |             |             |             |
|---|-------------|-------------|-------------|
| C | 5.04608700  | 1.11961400  | -0.08208400 |
| C | 7.07085300  | -0.73886800 | -0.61190500 |
| C | 6.37097100  | 1.56538100  | -0.28366900 |
| C | 4.76932600  | -0.28717400 | -0.10419300 |
| C | 5.77186000  | -1.21072400 | -0.40433000 |
| C | 7.36836200  | 0.63615900  | -0.53359100 |
| H | 6.59652700  | 2.62783100  | -0.25951500 |
| H | 5.55962800  | -2.26813000 | -0.51108400 |
| H | 8.38969100  | 0.97104700  | -0.69353400 |
| H | 7.85848500  | -1.44763000 | -0.85009300 |
| C | 3.81243000  | 1.79810500  | 0.09042200  |
| C | 1.08441900  | 2.54932500  | 0.16224100  |
| C | 2.79344000  | 0.81749200  | 0.16444300  |
| C | 3.43984800  | 3.18881000  | 0.12822000  |
| C | 2.11780500  | 3.54526800  | 0.17609900  |
| C | 1.45163300  | 1.12233200  | 0.19218300  |
| H | 4.21401500  | 3.95092600  | 0.10665000  |
| H | 1.84905200  | 4.59779500  | 0.18613000  |
| N | 3.38482800  | -0.47214900 | 0.11267500  |
| C | -0.30607100 | 2.75501900  | 0.02541700  |
| C | -3.09941200 | 2.87763600  | -0.24685600 |
| C | -1.08955000 | 1.52318800  | -0.04209100 |
| C | -0.96056300 | 4.01668000  | -0.06672100 |
| C | -2.32511200 | 4.06179900  | -0.22768600 |
| C | -2.49024300 | 1.62593300  | -0.08056800 |
| H | -0.38358800 | 4.93577800  | -0.02511600 |
| N | -3.31225000 | 0.45117400  | -0.01328200 |
| C | -5.48132800 | 1.35212500  | 0.97922200  |
| C | -6.60425500 | -1.08479800 | 0.05566800  |
| C | -4.69376600 | 0.42422700  | 0.28957800  |

|    |             |             |             |
|----|-------------|-------------|-------------|
| C  | -6.83007300 | 1.05423500  | 1.17300600  |
| C  | -7.39605400 | -0.14171000 | 0.70236700  |
| C  | -5.24584800 | -0.80928400 | -0.13986200 |
| H  | -7.45097100 | 1.76438500  | 1.71192500  |
| H  | -8.45149900 | -0.33940200 | 0.86515200  |
| C  | 2.75412000  | -1.65437700 | 0.49922600  |
| C  | 1.52378000  | -4.00308800 | 1.30683900  |
| C  | 3.50710800  | -2.67419100 | 1.11804600  |
| N  | 1.40135700  | -1.78273300 | 0.33504400  |
| C  | 0.83339800  | -2.94447300 | 0.75622300  |
| C  | 2.90483600  | -3.85414300 | 1.51055700  |
| H  | 4.55270000  | -2.49806400 | 1.32807500  |
| H  | -0.24250900 | -2.99245000 | 0.64917100  |
| H  | 3.48778400  | -4.62772500 | 2.00113600  |
| H  | 0.99110600  | -4.89890100 | 1.60658400  |
| C  | -2.98320200 | -0.80185000 | -0.50828100 |
| C  | -2.76042200 | -3.27392900 | -1.62657400 |
| N  | -1.74097800 | -1.25537900 | -0.75130300 |
| C  | -4.15564500 | -1.58714100 | -0.67440800 |
| C  | -4.03896500 | -2.85140500 | -1.24765400 |
| C  | -1.65908900 | -2.46834400 | -1.35940400 |
| H  | -4.90890600 | -3.48190400 | -1.40554900 |
| H  | -0.65637600 | -2.79029000 | -1.61491800 |
| H  | -2.60791100 | -4.23459600 | -2.10706400 |
| Pt | -0.01088600 | -0.12751600 | -0.07236300 |
| H  | -2.83193800 | 5.01638000  | -0.34148000 |
| H  | -5.05989000 | 2.26522700  | 1.37987700  |
| H  | -4.16392400 | 2.95134500  | -0.42569300 |
| H  | -7.02712800 | -2.02874000 | -0.27760400 |

## References:

- (1) Li, G.; Wolfe, A.; Brooks, J.; Zhu, Z.-Q.; Li, J. Modifying Emission Spectral Bandwidth of Phosphorescent Platinum(II) Complexes Through Synthetic Control. *Inorg. Chem.* **2017**, *56*, 8244–8256.
- (2) Connelly, N. G.; Geiger, W. E. Chemical Redox Agents for Organometallic Chemistry. *Chem. Rev.* **1996**, *96*, 877–910.
- (3) Harris, D. C. In Quantitative Chemical Analysis, 6th ed.; W. H. Freeman: New York, **2002**; pp 394–396.
- (4) Li, G.; Chen, Q.; Zheng, J.; Wang, Q.; Zhan, F.; Lou, W.; Yang, Y.-F.; She, Y. Metal-assisted delayed fluorescent Pd(II) complexes and phosphorescent Pt(II) complex based on [1,2,4]triazolo[4,3-a]pyridine-containing ligands: synthesis, characterization, electrochemistry, photophysical studies, and application. *Inorg. Chem.* **2019**, *58*, 21, 14349–14360.
- (5) Li, G.; Zhan, F.; Zheng, J.; Yang, Y.-F.; Wang, Q.; Chen, Q.; Shen, G.; She, Y. Highly Efficient Phosphorescent Tetradentate Platinum(II) Complexes Containing Fused 6/5/6 Metallocycles. *Inorg. Chem.* **2020**, *59*, 3718–3729.
- (6) Zhao, X.; She, Y.; Fang, K.; Li, G. CuCl-catalyzed Ullmann-Type C–N Cross-Coupling Reaction of Carbazoles and 2-Bromopyridine Derivatives. *J. Org. Chem.* **2017**, *82*, 1024–1033.
